# Supplementary material
Source: PubMed Central journal article supplement (PMC7571594)
Supplement: NIHMS1543044-supplement-Supplementary_Material.pdf [file NIHMS1543044-supplement-Supplementary_Material.pdf]

## Supplement 1. Pubmed search terms (August 3, 2017)

((((((((((("Meta-Analysis"[Publication Type] OR "Meta-Analysis as Topic"[Mesh] OR "Network Meta-Analysis"[Mesh] OR "Meta Analysis"[Title/Abstract] OR Metaanalysis[Title/Abstract] OR Meta-analysis[Title/Abstract] OR "Meta Analytic Review"[Title/Abstract] OR Metaanalyses[Title/Abstract] OR Meta-analyses[Title/Abstract]))) AND ("2006"[Date - Publication] : "3000"[Date - Publication])) AND ((treatment\*[Title/Abstract] OR intervention\*[Title/Abstract] OR program\*[Title/Abstract] OR technique\*[Title/Abstract] OR therap\*[Title/Abstract] OR strateg\*[Title/Abstract]))) AND ((accept\*[Title/Abstract] OR achievement[Title/Abstract] OR affect[Title/Abstract] OR "affect regulation"[Title/Abstract] OR agency[Title/Abstract] OR anger[Title/Abstract] OR anxiety[Title/Abstract] OR arousal[Title/Abstract] OR attention[Title/Abstract] OR autonomic[Title/Abstract] OR avoidance[Title/Abstract] OR "behavior regulation"[Title/Abstract] OR "behaviour regulation"[Title/Abstract] OR "behavioral regulation"[Title/Abstract] OR "behavioural regulation"[Title/Abstract] OR "body awareness"[Title/Abstract] OR cogniti\*[Title/Abstract] OR compassion[Title/Abstract] OR concentration[Title/Abstract] OR "conflict monitoring"[Title/Abstract] OR coping[Title/Abstract] OR decentering[Title/Abstract] OR de-centering[Title/Abstract] OR "decision making"[Title/Abstract] OR decision-making[Title/Abstract] OR "delay discounting"[Title/Abstract] OR depression[Title/Abstract] OR detach\*[Title/Abstract] OR discrimination[Title/Abstract] OR dis-identification[Title/Abstract] OR distraction[Title/Abstract] OR "distress tolerance"[Title/Abstract] OR "distress toleration"[Title/Abstract] OR dissociati\*[Title/Abstract] OR "dot probe"[Title/Abstract] OR ego[Title/Abstract] OR embodiment[Title/Abstract] OR emotion\*[Title/Abstract] OR "emotion regulation"[Title/Abstract] OR empath\*[Title/Abstract] OR equanimity[Title/Abstract] OR "executive function"[Title/Abstract] OR "experiential avoidance"[Title/Abstract] OR fear[Title/Abstract] OR "future orientation"[Title/Abstract] OR "goal setting"[Title/Abstract] OR habit\*[Title/Abstract] OR "identity"[Title/Abstract] OR impulsiv\*[Title/Abstract] OR kindness[Title/Abstract] OR memory[Title/Abstract] OR meta-awareness[Title/Abstract] OR metacogniti\*[Title/Abstract] OR meta-cogniti\*[Title/Abstract] OR "mind wandering"[Title/Abstract] OR motivation[Title/Abstract] OR neuroticism[Title/Abstract] OR nonattachment[Title/Abstract] OR non-attachment[Title/Abstract] OR nonjudgment[Title/Abstract] OR non-judgment[Title/Abstract] OR nonreactivity[Title/Abstract] OR non-reactivity[Title/Abstract] OR orienting[Title/Abstract] OR perspective\*[Title/Abstract] OR "positive psychology"[Title/Abstract] OR "problem solve"[Title/Abstract] OR "problem solving"[Title/Abstract] OR prosocial[Title/Abstract] OR "psychological distance"[Title/Abstract] OR "psychological flexibility"[Title/Abstract] OR reapprais\*[Title/Abstract] OR reconsolidation[Title/Abstract] OR re-perceiving[Title/Abstract] OR re-perceiving[Title/Abstract] OR resilience[Title/Abstract] OR "resource depletion"[Title/Abstract] OR reward[Title/Abstract] OR ruminat\*[Title/Abstract] OR "Self-Control"[Mesh] OR "self-control"[Title/Abstract] OR "self control"[Title/Abstract] OR self-monitor\*[Title/Abstract] OR self-regulat\*[Title/Abstract] OR "self regulation"[Title/Abstract] OR worry[Title/Abstract] OR "selective stopping"[Title/Abstract] OR "stimulus prioritization"[Title/Abstract] OR "stop signal"[Title/Abstract] OR stress[Title/Abstract] OR stroop[Title/Abstract] OR "Sustained Attention to Response Task"[Title/Abstract] OR sympathetic[Title/Abstract] OR top-down[Title/Abstract] OR "task switching"[Title/Abstract] OR threat[Title/Abstract] OR vigilance[Title/Abstract]))) AND (("Behavior and Behavior Mechanisms"[Mesh] OR "Health Behavior"[Mesh] OR "health behavior"[Title/Abstract] OR "health behavior"[Title/Abstract] OR "behavior change"[Title/Abstract] OR "behaviour change"[Title/Abstract] OR "behavioral

health"[Title/Abstract] OR "behavioural health"[Title/Abstract] OR "Healthy Lifestyle"[Mesh] OR diet[Title/Abstract] OR nutrition[Title/Abstract] OR "physical activity"[Title/Abstract] OR exercise[Title/Abstract] OR fitness[Title/Abstract] OR yoga[Title/Abstract] OR meditation[Title/Abstract] OR mindfulness[Title/Abstract] OR "Mind-Body Therapies"[Mesh] OR anxiety[Title/Abstract] OR "Anxiety"[Mesh] OR "Anxiety Disorders"[Mesh] OR depression[Title/Abstract] OR "Depression"[Mesh] OR "Depressive Disorder"[Mesh] OR stress[Title/Abstract] OR "Mental Health"[Mesh] OR "mental wellbeing"[Title/Abstract] OR "mental well being"[Title/Abstract] OR "mental well-being"[Title/Abstract] OR "Stress, Psychological"[Mesh] OR "Resilience, Psychological"[Mesh] OR resilience[Title/Abstract] OR "Adaptation, Psychological"[Mesh] OR coping[Title/Abstract] OR "Sleep"[Mesh] OR sleep[Title/Abstract] OR "Fatigue"[Mesh] OR fatigue[Title/Abstract] OR "substance abuse"[Title/Abstract] OR "substance use disorder"[Title/Abstract] OR "drug abuse" OR "alcohol abuse"[Title/Abstract] OR "drug dependence"[Title/Abstract] OR "alcohol dependence"[Title/Abstract] OR "Smoking Cessation"[Mesh] OR smoking[Title/Abstract] OR tobacco[Title/Abstract] OR cigarette\*[Title/Abstract] OR "nicotine dependence"[Title/Abstract] OR "Oral Hygiene"[Mesh] OR "oral health"[Title/Abstract] OR "oral hygiene"[Title/Abstract] OR "medication adherence"[Title/Abstract] OR "medical regimen adherence"[Title/Abstract] OR "medication compliance"[Title/Abstract] OR "medication adherence"[MESH] OR "medication persistence"[Title/Abstract] OR "drug compliance"[Title/Abstract] OR "drug adherence"[Title/Abstract] OR "drug persistence"[Title/Abstract] OR "pharmacotherapy compliance"[Title/Abstract] OR "pharmacotherapy adherence"[Title/Abstract] OR "heart-rate variability"[Title/Abstract] OR "heart rate variability"[Title/Abstract] OR "allostatic load"[Title/Abstract] OR "blood pressure"[Title/Abstract] OR "body mass index"[Title/Abstract] OR cortisol[Title/Abstract])])])])]) NOT animal[Filter]

## Supplement 2. References of included reviews

### References

- Abraham, C., & Graham-Rowe, E. (2009). Are worksite interventions effective in increasing physical activity? A systematic review and meta-analysis. *Health Psychology Review, 3*, 108-144. doi:10.1080/17437190903151096
- Adriaanse, M. A., Vinkers, C. D. W., De Ridder, D. T. D., Hox, J. J., & De Wit, J. B. F. (2011). Do implementation intentions help to eat a healthy diet? A systematic review and meta-analysis of the empirical evidence. *Appetite, 56*, 183-193. doi:10.1016/j.appet.2010.10.012
- Albarracín, J., Albarracín, D., & Durantini, M. (2008). Effects of HIV-prevention interventions for samples with higher and lower percents of Latinos and Latin Americans: A meta-analysis of change in condom use and knowledge. *AIDS and Behavior, 12*, 521-543. doi:10.1007/s10461-007-9209-8
- Allom, V., Mullan, B., & Hagger, M. (2015). Does inhibitory control training improve health behaviour? A meta-analysis. *Health Psychology Review, 10*, 1-38. doi:10.1080/17437199.2015.1051078
- Bolen, S. D., Chandar, A., Falck-Ytter, C., Tyler, C., Perzynski, A. T., Gertz, A. M., . . . Windish, D. M. (2014). Effectiveness and safety of patient activation interventions for adults with type 2 diabetes: Systematic review, meta-analysis, and meta-regression. *Journal of General Internal Medicine, 29*, 1166. doi:10.1007/s11606-014-2855-4

- Brannon, E. E., & Cushing, C. C. (2015). A systematic review: Is there an app for that? translational science of pediatric behavior change for physical activity and dietary interventions. *Journal of Pediatric Psychology, 40*, 373-384. doi:10.1093/jpepsy/jsu108
- Bravata, D. M., Smith-Spangler, C., Sundaram, V., Gienger, A. L., Lin, N., Lewis, R., . . . Sirard, J. R. (2007). Using pedometers to increase physical activity and improve health: A systematic review. *Jama, 298*, 2296. doi:10.1001/jama.298.19.2296
- Casey, B., Coote, S., Shirazipour, C., Hannigan, A., Motl, R., Martin Ginis, K., & Latimer-Cheung, A. (2017). Modifiable psychosocial constructs associated with physical activity participation in people with multiple sclerosis: A systematic review and meta-analysis. *Archives of Physical Medicine and Rehabilitation, 98*, 1453-1475. doi:10.1016/j.apmr.2017.01.027
- Chamberlain, C., O'Mara-Eves, A., Porter, J., Coleman, T., Perlen, S. M., Thomas, J., & McKenzie, J. E. (2017). Psychosocial interventions for supporting women to stop smoking in pregnancy. *Cochrane Database of Systematic Reviews*, doi:10.1002/14651858.CD001055.pub5
- Chase, D., J., Bogener, L., J., Ruppert, M., T., & Conn, S., V. (2016). The effectiveness of medication adherence interventions among patients with coronary artery disease: A meta-analysis. *The Journal of Cardiovascular Nursing, 31*, 357-366. doi:10.1097/JCN.0000000000000259
- Cheng, L., Sit, J. W. H., Choi, K., Chair, S., Li, X., & He, X. (2017). Effectiveness of interactive self-management interventions in individuals with poorly controlled type 2 diabetes: A

meta-analysis of randomized controlled trials. *Worldviews on Evidence-Based Nursing*, 14, 65-73. doi:10.1111/wvn.12191

Conn, V. S., Hafdahl, A. R., Brown, S. A., & Brown, L. M. (2008). Meta-analysis of patient education interventions to increase physical activity among chronically ill adults. *Patient Education and Counseling*, 70, 157-172. doi:10.1016/j.pec.2007.10.004

Conn, V. S., Hafdahl, A. R., Cooper, P. S., Ruppap, T. M., Mehr, D. R., & Russell, C. L. (2009). Interventions to improve medication adherence among older adults: Meta-analysis of adherence outcomes among randomized controlled trials. *Gerontologist*, 49, 447-462. doi:10.1093/geront/gnp037

Conn, V. S., & Ruppap, T. M. (2017). Medication adherence outcomes of 771 intervention trials: Systematic review and meta-analysis. *Preventive Medicine*, 99, 269-276. doi:10.1016/j.ypmed.2017.03.008

Conn, V., Ruppap, T., Chase, J., Enriquez, M., & Cooper, P. (2015). Interventions to improve medication adherence in hypertensive patients: Systematic review and meta-analysis. *Current Hypertension Reports*, 17, 1-15. doi:10.1007/s11906-015-0606-5

Cristea, I. A., Kok, R. N., & Cuijpers, P. (2016). The effectiveness of cognitive bias modification interventions for substance addictions: A meta-analysis. *PloS One*, 11(9), e0162226. doi:10.1371/journal.pone.0162226

- Darling, K. E., & Sato, A. F. (2017). Systematic review and meta-analysis examining the effectiveness of mobile health technologies in using self-monitoring for pediatric weight management. *Childhood Obesity, 13*(5), 347-355. doi:10.1089/chi.2017.0038
- Demonceau, J., Ruppard, T., Kristanto, P., Hughes, D., Fargher, E., Kardas, P., . . . Vrijens, B. (2013). Identification and assessment of adherence-enhancing interventions in studies assessing medication adherence through electronically compiled drug dosing histories: A systematic literature review and meta-analysis. *Drugs, 73*, 545-562. doi:10.1007/s40265-013-0041-3
- Denford, S., Taylor, R. S., Campbell, J. L., & Greaves, C. J. (2014). Effective behavior change techniques in asthma self-care interventions: Systematic review and meta-regression. *Health Psychology, 33*, 577-587. doi:10.1037/a0033080
- Dombrowski, S. U., Sniehotta, F. F., Avenell, A., Johnston, M., Maclennan, G., & Araújo-Soares, V. (2012). Identifying active ingredients in complex behavioural interventions for obese adults with obesity-related co-morbidities or additional risk factors for co-morbidities: A systematic review. *Health Psychology Review, 6*, 7-32. doi:10.1080/17437199.2010.513298
- Ebbert, J. O., Elrashidi, M. Y., & Stead, L. F. (2015). Interventions for smokeless tobacco use cessation. *Cochrane Database of Systematic Reviews*, (10) doi: 10.1002/14651858.CD004306.pub5

- Ebbert, J. O., Montori, V. M., Vickers-Douglas, K. S., Erwin, P. C., Dale, L. C., & Stead, L. F. (2007). Interventions for smokeless tobacco use cessation. *Cochrane Database of Systematic Reviews*, (4) doi: 10.1002/14651858.CD004306.pub3
- Epton, T., Harris, P. R., Kane, R., Van Koningsbruggen, G. M., & Sheeran, P. (2015). The impact of self-affirmation on health-behavior change: A meta-analysis. *Health Psychology*, 34, 187-196. doi:10.1037/hea0000116
- Eysenbach, G., Webb, T., Botelho, R., Cugelman, B., Thelwall, M., & Dawes, P. (2011). Online interventions for social marketing health behavior change campaigns: A meta-analysis of psychological architectures and adherence factors. *Journal of Medical Internet Research*, 13(1), e17. doi:10.2196/jmir.1367
- Fletcher, B. R., Hartmann-Boyce, J., Hinton, L., & McManus, R. J. (2015). The effect of self-monitoring of blood pressure on medication adherence and lifestyle factors: A systematic review and meta-analysis. *American Journal of Hypertension*, 28, 1209-1221. doi:10.1093/ajh/hpv008
- French, D. P., Olander, E. K., Chisholm, A., & Mc Sharry, J. (2014). Which behaviour change techniques are most effective at increasing older adults' self-efficacy and physical activity behaviour? A systematic review. 48(2), 225-234. doi:10.1007/s12160-014-9593-z
- Glynn, L. G., Murphy, A. W., Smith, S. M., Schroeder, K., & Fahey, T. (2010). Self-monitoring and other non-pharmacological interventions to improve the management of hypertension in primary care: A systematic review. *The British Journal of General Practice: The Journal of the Royal College of General Practitioners*, 60, e476. doi:10.3399/bjgp10X544113

Goodwin, L., Ostuzzi, G., Khan, N., Matthew, H. H., & Rona Moss-Morris. (2016). Can we identify the active ingredients of behaviour change interventions for coronary heart disease patients? A systematic review and meta-analysis. *PloS One*, *11*, e0153271.  
doi:10.1371/journal.pone.0153271

Hajek, P., Stead, L. F., West, R., Jarvis, M., Hartmann-Boyce, J., & Lancaster, T. (2013). Relapse prevention interventions for smoking cessation. *Cochrane Database of Systematic Reviews*, (8). doi:10.1002/14651858.CD003999.pub4

Hartmann-Boyce, J., Johns, D. J., Jebb, S. A., Summerbell, C., & Aveyard, P. (2014). Behavioural weight management programmes for adults assessed by trials conducted in everyday contexts: Systematic review and meta-analysis. *Obesity Reviews*, *15*, 920-932.  
doi:10.1111/obr.12220

Higgins, T. J., Middleton, K. R., Winner, L., & Janelle, C. M. (2014). Physical activity interventions differentially affect exercise task and barrier self-efficacy: A meta-analysis. *Health Psychology*, *33*, 891-903. doi:10.1037/a0033864

Janssen, V., De Gucht, V., Dusseldorp, E., & Maes, S. (2013). Lifestyle modification programmes for patients with coronary heart disease: A systematic review and meta-analysis of randomized controlled trials. *European Journal of Preventive Cardiology*, *20*, 620. doi:10.1177/2047487312462824

Jones, A., Di Lemma, L. C. G., Robinson, E., Christiansen, P., Nolan, S., Tudur-Smith, C., & Field, M. (2016). Inhibitory control training for appetitive behaviour change: A meta-



analytic investigation of mechanisms of action and moderators of effectiveness. *Appetite*, 97, 16-28. doi:10.1016/j.appet.2015.11.013

Knittle, K., Maes, S., & De Gucht, V. (2010). Psychological interventions for rheumatoid arthritis: Examining the role of self-regulation with a systematic review and meta-analysis of randomized controlled trials. *Arthritis Care & Research*, 62, 1460-1472. doi:10.1002/acr.20251

Lara, J., Evans, E. H., O'Brien, N., Moynihan, P. J., Meyer, T. D., Adamson, A. J., . . . Mathers, J. C. (2014). Association of behaviour change techniques with effectiveness of dietary interventions among adults of retirement age: A systematic review and meta-analysis of randomised controlled trials. *BMC Medicine*, 12, 177. doi:10.1186/s12916-014-0177-3

Lenferink, A., Brusse-Keizer, M., van, d. V., Frith, P. A., Zwerink, M., Monninkhof, E. M., . . . Effing, T. W. (2017). Self-management interventions including action plans for exacerbations versus usual care in patients with chronic obstructive pulmonary disease. *Cochrane Database of Systematic Reviews*, (8). doi:10.1002/14651858.CD011682.pub2

Lim, S., O' Reilly, S., Behrens, H., Skinner, T., Ellis, I., & Dunbar, J. A. (2015). Effective strategies for weight loss in post-partum women: A systematic review and meta-analysis. *Obesity Reviews*, 16(11), 972-987. doi:10.1111/obr.12312

Lin, M., Liu, M. F., Hsu, L., & Tsai, P. (2017). Effects of self-management on chronic kidney disease: A meta-analysis. *International Journal of Nursing Studies*, 74, 128-137. doi:10.1016/j.ijnurstu.2017.06.008

Luangasanatip, N., Hongsuwan, M., Limmathurotsakul, D., Lubell, Y., Lee, A. S., Harbarth, S., . . . Cooper, B. S. (2015). Comparative efficacy of interventions to promote hand hygiene in hospital: Systematic review and network meta-analysis. *BMJ*, *351*, h3728.

doi:10.1136/bmj.h3728

Malanda, U. L., Welschen, L. M. C., Riphagen, I., Dekker, J. M., Nijpels, G., & Bot, S. D. M. (2012). Self-monitoring of blood glucose in patients with type 2 diabetes mellitus who are not using insulin. *Cochrane Database of Systematic Reviews*, (1). doi:

10.1002/14651858.CD005060.pub3

Mannucci, E., Antenore, A., Giorgino, F., & Scavini, M. (2018). Effects of structured versus unstructured self-monitoring of blood glucose on glucose control in patients with non-insulin-treated type 2 diabetes: A meta-analysis of randomized controlled trials. *Journal of Diabetes Science and Technology*, *12*, 183-189. doi:10.1177/1932296817719290

French, D.P., Olander, E. K., Chisholm, A., & Mc Sharry, J. (2014). Which behaviour change techniques are most effective at increasing older adults' self-efficacy and physical activity behaviour? A systematic review, *48*(2), 225-234. doi:10.1007/s12160-014-9593-z

McDermott, M. S., Oliver, M., Iverson, D., & Sharma, R. (2016). Effective techniques for changing physical activity and healthy eating intentions and behaviour: A systematic review and meta-analysis. *British Journal of Health Psychology*, *21*, 827-841.

doi:10.1111/bjhp.12199

McEwan, D., Harden, S. M., Zumbo, B. D., Sylvester, B. D., Kaulius, M., Ruissen, G. R., . . .

Beauchamp, M. R. (2015). The effectiveness of multi-component goal setting interventions

for changing physical activity behaviour: A systematic review and meta-analysis. *Health Psychology Review*, *10*, 1-44. doi:10.1080/17437199.2015.1104258

Michie, S., Abraham, C., Whittington, C., McAteer, J., & Gupta, S. (2009). Effective techniques in healthy eating and physical activity interventions: A meta-regression. *Health Psychology*, *28*, 690-701. doi:10.1037/a0016136

O'Brien, N., McDonald, S., Araújo-Soares, V., Lara, J., Errington, L., Godfrey, A., . . . Sniehotta, F. F. (2015). The features of interventions associated with long-term effectiveness of physical activity interventions in adults aged 55 to 70 years: A systematic review and meta-analysis. *Health Psychology Review*, *9*, 1-29. doi:10.1080/17437199.2015.1012177

Olander, E. K., Fletcher, H., Williams, S., Atkinson, L., Turner, A., & French, D. P. (2013). What are the most effective techniques in changing obese individuals' physical activity self-efficacy and behaviour: A systematic review and meta-analysis. *The International Journal of Behavioral Nutrition and Physical Activity*, *10*, 29. doi:10.1186/1479-5868-10-29

Onrust, S. A., Otten, R., Lammers, J., & Smit, F. (2016). School-based programmes to reduce and prevent substance use in different age groups: What works for whom? Systematic review and meta-regression analysis. *Clinical Psychology Review*, *44*, 45-59. doi:10.1016/j.cpr.2015.11.002

Ruppar, M., T., Dunbar-Jacob, M., Mehr, R., D., Lewis, S., L., & Conn, S., V. (2017). Medication adherence interventions among hypertensive black adults: A systematic review and meta-analysis. *Journal of Hypertension*, *35*, 1145-1154. doi:10.1097/HJH.0000000000001260

Samdal, G. B., Eide, G. E., Barth, T., Williams, G., & Meland, E. (2017). Effective behaviour change techniques for physical activity and healthy eating in overweight and obese adults; systematic review and meta-regression analyses. *14*(1), 42. doi:10.1186/s12966-017-0494-y

Scott-Sheldon, L., Carey, K. B., Elliott, J. C., Garey, L., & Carey, M. P. (2014). Efficacy of alcohol interventions for first-year college students: A meta-analytic review of randomized controlled trials. *Journal of Consulting and Clinical Psychology, 82*, 177-188.  
doi:10.1037/a0035192

Sheeran, P., Maki, A., Montanaro, E., Avishai-Yitshak, A., Bryan, A., Klein, W. M. P., . . . Rothman, A. J. (2016). The impact of changing attitudes, norms, and self-efficacy on health-related intentions and behavior: A meta-analysis. *Health Psychology, 35*, 1178-1188.  
doi:10.1037/hea0000387

Sherifali, D., Bai, J. -, Kenny, M., Warren, R., & Ali, M. U. (2015). Diabetes self-management programmes in older adults: A systematic review and meta-analysis. *Diabetic Medicine, 32*, 1404-1414. doi:10.1111/dme.12780

Song, F., Huttunen-Lenz, M., & Holland, R. (2010). Effectiveness of complex psycho-educational interventions for smoking relapse prevention: An exploratory meta-analysis. *Journal of Public Health, 32*, 350-359. doi:10.1093/pubmed/fdp109

Spohr, S. A., Nandy, R., Gandhiraj, D., Vemulapalli, A., Anne, S., & Walters, S. T. (2015). Efficacy of SMS text message interventions for smoking cessation: A meta-analysis. *Journal of Substance Abuse Treatment, 56*, 1-10. doi:10.1016/j.jsat.2015.01.011

St Amand, A., Bard, D. E., & Silovsky, J. F. (2008). Meta-analysis of treatment for child sexual behavior problems: Practice elements and outcomes. *Child Maltreatment, 13*, 145.

doi:10.1177/1077559508315353

Sykes-Muskett, B., Prestwich, A., Lawton, R. J., & Armitage, C. J. (2015). The utility of monetary contingency contracts for weight loss: A systematic review and meta-analysis.

*Health Psychology Review, 9*, 1-21. doi:10.1080/17437199.2015.1030685

Tanner-Smith, E., & Lipsey, M. W. (2015). Brief alcohol interventions for adolescents and young adults: A systematic review and meta-analysis. *Journal of Substance Abuse Treatment, 51*, 1-18. doi:10.1016/j.jsat.2014.09.001

Tanner-Smith, E., Steinka-Fry, K., Hennessy, E., Lipsey, M., & Winters, K. (2015). Can brief alcohol interventions for youth also address concurrent illicit drug use? Results from a meta-analysis. *Journal of Youth and Adolescence, 44*, 1011-1023. doi:10.1007/s10964-015-0252-

x

Toli, A., Webb, T. L., & Hardy, G. E. (2015). Does forming implementation intentions help people with mental health problems to achieve goals? A meta-analysis of experimental studies with clinical and analogue samples. *55*, 69-90. doi:10.1111/bjc.12086

Turton, R., Bruidegom, K., Cardi, V., Hirsch, C. R., & Treasure, J. (2016). Novel methods to help develop healthier eating habits for eating and weight disorders: A systematic review and meta-analysis. *Neuroscience and Biobehavioral Reviews, 61*, 132-155.

doi:10.1016/j.neubiorev.2015.12.008

Tyson, M., Covey, J., & Rosenthal, H. E. S. (2014). Theory of planned behavior interventions for reducing heterosexual risk behaviors: A meta-analysis. *Health Psychology, 33*, 1454-1467. doi:10.1037/hea0000047

Van Genugten, L., Dusseldorp, E., Massey, E. K., & Van Empelen, P. (2017). Effective self-regulation change techniques to promote mental wellbeing among adolescents: A meta-analysis. *Health Psychology Review, 11*, 53-71. doi:10.1080/17437199.2016.1252934

van Genugten, L., Dusseldorp, E., Webb, T. L., & van Empelen, P. (2016). Which combinations of techniques and modes of delivery in internet-based interventions effectively change health behavior? A meta-analysis. *Journal of Medical Internet Research, 18* doi:10.2196/jmir.4218

van Genugten, L., Dusseldorp, E., Webb, T. L., & van Empelen, P. (2016). Which combinations of techniques and modes of delivery in internet-based interventions effectively change health behavior? A meta-analysis. *Journal of Medical Internet Research, 18*, e155. doi:10.2196/jmir.4218

Webb, T. L., Joseph, J., Yardley, L., & Michie, S. (2010). Using the internet to promote health behavior change: A systematic review and meta-analysis of the impact of theoretical basis, use of behavior change techniques, and mode of delivery on efficacy. *Journal of Medical Internet Research, 12*(1), e4. doi:10.2196/jmir.1376

West, R., Raw, M., McNeill, A., Stead, L., Aveyard, P., Bitton, J., . . . Borland, R. (2015). Health-care interventions to promote and assist tobacco cessation: A review of efficacy,

effectiveness and affordability for use in national guideline development. *Addiction*, *110*, 1388-1403. doi:10.1111/add.12998

Zhu, H., Zhu, Y., & Leung, S. (2016). Is self-monitoring of blood glucose effective in improving glycaemic control in type 2 diabetes without insulin treatment: A meta-analysis of randomised controlled trials. *BMJ*, *6*. doi:10.1136/bmjopen-2015-010524

### Supplemental 3. Tables and Figures

Table 1.

*Coding definitions and examples for self-regulation intervention components*

| <b>Component</b>                                    | <b>Definition used for coding</b>                                                   | <b>Examples</b>                                                                                                                                                                                                                                                                                                                                                                                                                                                                                                                                                                                                                                                                                                                                                                                                                                                                                                                                                                                                       |
|-----------------------------------------------------|-------------------------------------------------------------------------------------|-----------------------------------------------------------------------------------------------------------------------------------------------------------------------------------------------------------------------------------------------------------------------------------------------------------------------------------------------------------------------------------------------------------------------------------------------------------------------------------------------------------------------------------------------------------------------------------------------------------------------------------------------------------------------------------------------------------------------------------------------------------------------------------------------------------------------------------------------------------------------------------------------------------------------------------------------------------------------------------------------------------------------|
| Goal setting                                        | Goal setting outcome and goal setting behaviour                                     | <ul style="list-style-type: none"> <li>● “Step goal”, “facilitate goal setting”, “subject-generated written or oral medication adherence behavioral goals”, “the setting of graded tasks”</li> <li>● “T10. Prompt specific goal setting” (Michie et al., 2009)</li> <li>● Person is encouraged to set a general goal that can be achieved by behavioural means but is not defined in terms of behaviour (e.g., to reduce blood pressure or lose/maintain weight), as opposed to a goal based on changing behaviour as such (French et al., 2014)</li> <li>● Goal setting defined as the 'setting of specific goals aimed at improving compliance with hand hygiene, which can both apply at individual and group level and can include healthcare associated infection rates' (Luangasanatip et al., 2015)</li> <li>● Subject-generated written or oral medication adherence behavioral goals—sometimes with action plans (Conn, Ruppap, 2017)</li> </ul>                                                             |
| Implementation intentions<br>Prompt review of goals | Implementation intention interventions<br>Review behavioural goals or outcome goals | <ul style="list-style-type: none"> <li>● “Goal intentions furnished with specific action plans” (Adriaanse et al., 2011)</li> <li>● T11: Prompt review of behavioral goals: review and/or reconsideration of previously set goals or intentions (Tyson et al., 2014)</li> <li>● Prompt review of outcome goals (BCT 11) Sykes-Muskett et al., 2015)</li> <li>● “Behavior goal review” (O'Brien et al., 2015)</li> </ul>                                                                                                                                                                                                                                                                                                                                                                                                                                                                                                                                                                                               |
| Prompt self-monitoring                              | Self-monitoring of behaviour and self-monitoring of outcome                         | <ul style="list-style-type: none"> <li>● T12. Prompt self-monitoring of behavior: The person is asked to keep a record of specified behaviors (e.g., in a diary) (Tyson et al., 2014)</li> <li>● Prompt self-monitoring of behaviour (BCT 16)</li> <li>● Prompt self-monitoring of behavioural outcome (BCT 17)</li> <li>● “Self-measurement of blood pressure” (Bray et al., 2010); “Subjects record their medication behavior, sometimes using medication diaries” (Conn &amp; Ruppap, 2017); “step diary” (Bravata et al., 2007); “Use of exercise logs” (Higgins et al., 2014)</li> <li>● Self-monitoring as an intervention component measured through exercise logs, heart rate monitors (to determine exercise intensity) or pedometers (Lim et al., 2015)</li> <li>● Monitoring behavior and monitoring outcomes (Harkin et al., 2016)</li> <li>● Self-measurement of blood pressure without medical professional input, if usual care did not include patient self-monitoring (Bray et al., 2010)</li> </ul> |



|                                                        |                                                                                                |                                                                                                                                                                                                                                                                                                                                                                                                                                                                                                                                                                                                                                                                                                                                                                                                                                   |
|--------------------------------------------------------|------------------------------------------------------------------------------------------------|-----------------------------------------------------------------------------------------------------------------------------------------------------------------------------------------------------------------------------------------------------------------------------------------------------------------------------------------------------------------------------------------------------------------------------------------------------------------------------------------------------------------------------------------------------------------------------------------------------------------------------------------------------------------------------------------------------------------------------------------------------------------------------------------------------------------------------------|
| Emotional control training/Inhibitory control training | Emotional control training BCT<br>Inhibitory control training                                  | <ul style="list-style-type: none"> <li>● “BS - Specific focus on behaviour, maximizing self-regulatory capacity/skills” (Bartlett, Sheeran, &amp; Hawley, 2014)</li> <li>● 'The person is asked to keep a record of specified behaviors' (Brannon &amp; Cushing, 2015)</li> <li>● Self-monitoring as an intervention component in mHealth interventions through text messaging or phone apps (Darling &amp; Sato, 2017)</li> <li>● “Inhibitory control training task (Stop Signal, Go/No- Go, and Antisaccade)” (Jones et al., 2016); “food-specific inhibition training (Stop-signal training and Go/no go training)” (Turton et al., 2016)</li> <li>● “Emotional control training such as the go/no-go task (GNG) or the stop-signal task (SST) which is used to strengthen inhibitory control” (Allom et al., 2016)</li> </ul> |
| Prompt self-talk<br>Stress management                  | Prompt self-talk BCT<br>Stress management BCT<br>Emotional control training                    | <ul style="list-style-type: none"> <li>● “BS6 - Prompt self-recording” (Bartlett et al., 2014)</li> <li>● Stress management/emotional control training: This is a set of specific techniques (e.g., progressive relaxation) that do not target the behaviour directly but seek to reduce anxiety and stress to facilitate the performance of the behaviour (French et al., 2014)</li> <li>● Teaching subjects stress-reduction methods, including coping skills, relaxation methods, anger-management, and mindfulness techniques (Conn &amp; Ruppap, 2017)</li> </ul>                                                                                                                                                                                                                                                            |
| Action planning                                        | Action planning BCT                                                                            | <ul style="list-style-type: none"> <li>● “BS3 - Facilitate action planning/develop treatment plan” (Bartlett et al., 2014); “Action and coping plans” (Bélanger-Gravel et al., 2013); “Strategy planning (goal-related BCTs)” (McEwan et al., 2016)</li> <li>● Action planning: involves detailed planning of what the person will do including, as a minimum, when, in which situation and/or where to act (French et al., 2014)</li> <li>● “COPD self-management interventions that included a written action plan for acute exacerbations of COPD” (Lenferink et al., 2017)</li> </ul>                                                                                                                                                                                                                                         |
| Barrier identification<br>/Problem solving             | Problem solving BCT<br>Prompt barrier identification<br>Barrier identification/Problem solving | <ul style="list-style-type: none"> <li>● “Problem solving: Studies have used problem solving as a multidimensional construct, comprising both effective and ineffective problem-solving strategies, emotional and cognitive orientation to problem solving, ability to learn from past experience, and environmental context. Problem solving was checked only if problem solving was specifically mentioned in the article, even if a description of problem solving was not provided.” (Bolen et al., 2014)</li> <li>● Prompt barrier identification: identify barriers to performing the behavior and plan ways of overcoming them (Tyson et al., 2014); “self-management skills” (Albarracin et al., 2008)</li> </ul>                                                                                                         |

|                                    |                                                                                                                           |                                                                                                                                                                                                                                                                                                                                                                                                                                                                                                                                                                                                                                                                                                                                                                                                                                                                                                                                                                                                                                                                                                                                                                                                                                                                                                                                                                                                                                                                          |
|------------------------------------|---------------------------------------------------------------------------------------------------------------------------|--------------------------------------------------------------------------------------------------------------------------------------------------------------------------------------------------------------------------------------------------------------------------------------------------------------------------------------------------------------------------------------------------------------------------------------------------------------------------------------------------------------------------------------------------------------------------------------------------------------------------------------------------------------------------------------------------------------------------------------------------------------------------------------------------------------------------------------------------------------------------------------------------------------------------------------------------------------------------------------------------------------------------------------------------------------------------------------------------------------------------------------------------------------------------------------------------------------------------------------------------------------------------------------------------------------------------------------------------------------------------------------------------------------------------------------------------------------------------|
| Relapse prevention/coping planning | Relapse prevention<br>Relapse prevention/coping planning                                                                  | <ul style="list-style-type: none"> <li>● Barrier identification/problem solving: This presumes having formed an initial plan to change behaviour. The person is prompted to think about potential barriers and identify ways of overcoming them (French et al., 2014)</li> <li>● 'Facilitate barrier identification and problem solving' (Bartlett et al., 2014): "Identification of high-risk situations" (Scott-Sheldon et al., 2014)</li> <li>● Specifically address barriers to adherence and adherence problem solving (Conn et al., 2015)</li> <li>● "Barrier management: The management of barriers was determined based on the definition provided by Abraham and Michie (2008) in the taxonomy of theoretical techniques for behaviour change." (Bélanger-Gravel et al., 2013)</li> <li>● Relapse prevention: following initial change, help identify situations likely to result in readopting risk behaviors or failure to maintain new behaviors, and help the person plan to avoid or manage these situations (Tyson et al., 2014)</li> <li>● Relapse prevention/coping planning: This relates to planning how to maintain behaviour that has been changed. The person is prompted to identify in advance situations in which the changed behaviour may not be maintained and develop strategies to avoid or manage those situations (French et al., 2014)</li> <li>● "On-demand messaging services for additional support" (Spohr et al., 2015)</li> </ul> |
| Time management                    | Time management BCT                                                                                                       | <ul style="list-style-type: none"> <li>● T26. Time management (Michie et al., 2009)</li> </ul>                                                                                                                                                                                                                                                                                                                                                                                                                                                                                                                                                                                                                                                                                                                                                                                                                                                                                                                                                                                                                                                                                                                                                                                                                                                                                                                                                                           |
| Provide feedback                   | BCT 2.2 - Feedback on behaviour<br>BCT 2.7 - Feedback on outcome of behaviour<br>Provide feedback on performance (BCT 19) | <ul style="list-style-type: none"> <li>● "Feedback: an intervention that includes a review process following some intervention (e.g., education)" (Sherifali et al., 2015)</li> <li>● "Direct feedback to patients" (Ebbert et al., 2007); "Intervention component based on electronically monitored adherence feedback" (Demonceau et al., 2013); "Feedback intervention component (goal-related BCTs)" (McEwan et al., 2016); "Personalized feedback" (Scott-Sheldon et al., 2014)</li> <li>● "Feedback about subjects' adherence scores and feedback about blood pressure" (Conn et al., 2015); "Interventions that included assessment messages" (Spohr et al., 2015)</li> </ul>                                                                                                                                                                                                                                                                                                                                                                                                                                                                                                                                                                                                                                                                                                                                                                                     |

---

*Note.* BCT = behaviour change technique.

Table 2

Results of Methodological Quality for each Meta-Analysis Using the AMSTAR 2 Instrument

| Meta-analysis                                                                                                                     |      |                      |                      |                 |               |            |          |                       |                      |                    |              |                     |                           |                   |                          |                      |                   |                 |        |                  |         |                           |            |             |                 |                              |                               |                   |                 |               |                  |               |
|-----------------------------------------------------------------------------------------------------------------------------------|------|----------------------|----------------------|-----------------|---------------|------------|----------|-----------------------|----------------------|--------------------|--------------|---------------------|---------------------------|-------------------|--------------------------|----------------------|-------------------|-----------------|--------|------------------|---------|---------------------------|------------|-------------|-----------------|------------------------------|-------------------------------|-------------------|-----------------|---------------|------------------|---------------|
|                                                                                                                                   | PICO | Type of study design | Participants/setting | Intervention(s) | Comparator(s) | Outcome(s) | Protocol | Study design criteria | Searched 2 databases | Provided key words | Justified PR | Searched ref. lists | Searched study registries | Consulted experts | Searched grey literature | Search within 24 mo. | Literature search | Study selection | Coding | Excluded studies | PRISMA* | Included studies - detail | RoB - RCTs | RoB - NRSIs | Funding sources | Meta-analysis methods - RCTs | Meta-analysis methods - NRSIs | Assess RoB impact | Incorporate RoB | Heterogeneity | Publication bias | COIs reported |
| Abraham C, Graham-Rowe E, 2009                                                                                                    | Y    | X                    | X                    | X               |               | X          | No       | No                    | X                    | X                  |              |                     |                           |                   |                          | X                    | No                | No              | Y      | No               | No      | Y                         | No         | No          | No              | Y                            | No                            | Y                 | Y               | Y             | No               | No            |
| Adriaanse MA, Vinkers CD, De Ridder DT, Hox JJ, De Wit JB, 2011                                                                   | No   |                      |                      | X               |               | X          | No       | No                    | X                    | X                  |              | X                   |                           |                   |                          | X                    | No                | No              | No     | No               | No      | PY                        | No         | No          | No              | No                           | No                            | No                | No              | Y             | Y                | No            |
| Albarracín J, Albarracín D, Durantini M, 2008                                                                                     | No   |                      | X                    | X               |               | X          | No       | No                    | X                    | X                  | X            | X                   |                           | X                 | X                        |                      | PY                | No              | Y      | No               | No      | No                        | No         | No          | No              | No                           | No                            | No                | No              | No            | No               | No            |
| Allom V, Mullan B, Hagger M, 2016                                                                                                 | Y    | X                    |                      | X               | X             |            | No       | No                    | X                    | X                  |              | X                   |                           | X                 | X                        | X                    | No                | No              | Y      | PY               | Y       | No                        | No         | NA          | No              | Y                            | NA                            | No                | No              | Y             | Y                | Y             |
| Bartlett YK, Sheeran P, Hawley MS, 2014                                                                                           | Y    | X                    | X                    | X               |               | X          | No       | No                    | X                    | X                  |              | X                   |                           |                   |                          | X                    | No                | No              | No     | No               | Y       | Y                         | No         | NA          | No              | Y                            | NA                            | Y                 | Y               | Y             | Y                | No            |
| Bélangier-Gravel A, Godin G, Amireault S, 2013                                                                                    | Y    | X                    | X                    | X               | X             | X          | No       | No                    | X                    | X                  |              | X                   | X                         | X                 | X                        |                      | No                | No              | Y      | No               | Y       | PY                        | No         | NA          | No              | No                           | NA                            | No                | No              | No            | Y                | No            |
| Bolen SD, Chandar A, Falck-Ytter C, Tyler C, Perzynski AT, Gertz AM, Sage P, Lewis S, Cobabe M, Ye Y, Menegay M, Windish DM, 2014 | Y    | X                    | X                    | X               | X             | X          | No       | No                    | X                    | X                  |              | X                   | X                         |                   |                          | No                   | No                | Y               | No     | Y                | PY      | PY                        | NA         | Y           | Y               | NA                           | Y                             | Y                 | Y               | Y             | Y                | Y             |
| Brannon EE, Cushing CC, 2015                                                                                                      | Y    | X                    | X                    | X               |               | X          | No       | Y                     | X                    | X                  |              |                     |                           |                   |                          | X                    | No                | No              | No     | No               | Y       | PY                        | Y          | NA          | No              | Y                            | NA                            | No                | No              | Y             | No               | Y             |
| Bravata DM, Smith-Spangler C, Sundaram V, Gienger AL, Lin N, Lewis R, Stave CD, Olkin I, Sirard JR, 2007                          | No   |                      | X                    | X               |               | X          | No       | No                    | X                    | X                  |              | X                   |                           | X                 |                          | X                    | No                | No              | Y      | No               | Y       | PY                        | No         | No          | No              | Y                            | Y                             | No                | No              | Y             | No               | Y             |
| Bray EP, Holder R, Mant J, McManus RJ, 2010                                                                                       | No   | X                    |                      | X               | X             | X          | Y        | No                    | X                    | X                  | X            | X                   |                           |                   |                          | X                    | PY                | No              | Y      | No               | Y       | Y                         | No         | NA          | No              | Y                            | NA                            | No                | No              | Y             | Y                | Y             |
| Casey B, Coote S, Shirazipour C, Hannigan A, Motl R, Martin Ginis K, Latimer-Cheung A, 2017                                       | Y    | X                    | X                    | X               |               | X          | No       | No                    | X                    | X                  |              | X                   |                           | X                 |                          | X                    | No                | Y               | Y      | No               | Y       | PY                        | PY         | PY          | No              | No                           | No                            | No                | No              | Y             | No               | No            |
| Chamberlain C, O'Mara-Eves A, Porter J, Coleman T, Perlen SM, Thomas J, McKenzie JE, 2017                                         | Y    | X                    | X                    | X               | X             | X          | Y        | No                    | X                    | X                  | X            | X                   | X                         | X                 | X                        | X                    | Y                 | Y               | Y      | Y                | Y       | Y                         | Y          | NA          | No              | Y                            | NA                            | Y                 | Y               | Y             | Y                | Y             |
| Chase J-AD, Bogener JL, Ruppap TM, Conn VS, 2016                                                                                  | No   |                      | X                    | X               | X             | X          | No       | No                    | X                    | X                  | X            | X                   | X                         |                   |                          |                      | PY                | No              | Y      | No               | No      | No                        | PY         | No          | No              | Y                            | No                            | Y                 | No              | Y             | No               | Y             |
| Cheng L, Sit JW, Choi KC, Chair SY, Li X, He XL, 2017                                                                             | Y    | X                    | X                    | X               | X             | X          | No       | No                    | X                    | X                  |              | X                   | X                         |                   |                          | X                    | No                | Y               | Y      | No               | Y       | Y                         | NA         | No          | Y               | NA                           | No                            | Y                 | Y               | Y             | No               | No            |
| Conn VS, Hafdahl AR, Brown SA, Brown LM, 2008                                                                                     | Y    | X                    | X                    | X               |               | X          | No       | Y                     | X                    | X                  |              | X                   | X                         | X                 |                          | No                   | No                | Y               | No     | No               | No      | No                        | No         | No          | No              | No                           | No                            | No                | No              | Y             | Y                | No            |
| Conn VS, Hafdahl AR, Cooper PS, Ruppap TM, Mehr DR, Russell CL, 2009                                                              | Y    | X                    | X                    | X               |               | X          | No       | Y                     | X                    | X                  |              | X                   | X                         |                   | X                        | No                   | No                | Y               | No     | No               | PY      | No                        | NA         | No          | Y               | NA                           | No                            | No                | Y               | Y             | No               |               |
| Conn VS, Hafdahl AR, Mehr DR, 2011                                                                                                | No   |                      |                      | X               |               | X          | No       | No                    | X                    |                    |              | X                   | X                         |                   |                          | No                   | No                | Y               | No     | No               | No      | No                        | No         | No          | Y               | No                           | No                            | Y                 | Y               | Y             | No               |               |
| Conn VS, Ruppap TM, 2017                                                                                                          | No   |                      | X                    | X               |               | X          | No       | No                    | X                    | X                  |              | X                   | X                         | X                 | X                        | No                   | No                | Y               | No     | Y                | PY      | No                        | No         | No          | Y               | No                           | No                            | No                | Y               | Y             | Y                |               |
| Conn VS, Ruppap TM, Chase J A.D, Enriquez M, Cooper PS, 2015                                                                      | Y    | X                    | X                    | X               |               | X          | No       | No                    | X                    | X                  | X            |                     | X                         |                   |                          | PY                   | No                | No              | No     | Y                | No      | PY                        | No         | No          | Y               | No                           | Y                             | Y                 | Y               | Y             | Y                |               |
| Cristea IA, Kok RN, Cuijpers P, 2016                                                                                              | No   | X                    |                      | X               | X             | X          | No       | No                    | X                    | X                  | X            |                     |                           |                   |                          | X                    | PY                | No              | No     | No               | Y       | PY                        | Y          | NA          | No              | No                           | NA                            | Y                 | Y               | Y             | Y                | Y             |
| Cugelman B, Thelwall M, Dawes P, 2011                                                                                             | Y    | X                    | X                    | X               | X             | X          | No       | No                    | X                    | X                  |              |                     |                           | X                 | X                        | X                    | No                | No              | No     | No               | Y       | PY                        | PY         | PY          | No              | Y                            | No                            | No                | No              | No            | No               | Y             |
| Darling KE, Sato AF, 2017                                                                                                         | No   |                      | X                    | X               |               | X          | No       | No                    | X                    | X                  |              |                     |                           |                   |                          | X                    | No                | No              | No     | No               | Y       | PY                        | No         | No          | No              | No                           | No                            | No                | No              | No            | No               | Y             |
| Demonceau J, Ruppap T, Kristanto P, Hughes D, Fargher E, Kardas P, Geest S, Dobbels F, Lewek P, Urquhart J, Vrijens B, 2013       | Y    | X                    | X                    | X               | X             | X          | No       | No                    | X                    | X                  |              |                     |                           |                   |                          | X                    | No                | Y               | Y      | No               | Y       | PY                        | Y          | NA          | No              | Y                            | NA                            | Y                 | Y               | Y             | Y                | Y             |
| Denford S, Taylor RS, Campbell JL, Greaves CJ, 2014                                                                               | Y    | X                    | X                    | X               | X             | X          | No       | No                    | X                    | X                  | X            | X                   | X                         |                   |                          | X                    | PY                | No              | Y      | No               | Y       | PY                        | Y          | NA          | No              | Y                            | NA                            | Y                 | Y               | Y             | Y                | Y             |
| Dombrowski SU, Sniehotta FF, Avenell A, Johnston M, MacLennan G, Araújo-Soares V, 2012                                            | Y    | X                    | X                    | X               | X             | X          | No       | No                    | X                    |                    |              | X                   |                           |                   |                          | No                   | No                | No              | No     | Y                | PY      | PY                        | NA         | No          | Y               | NA                           | Y                             | No                | Y               | Y             | No               |               |
| Ebbert JO, Montori V, Vickers KS, Erwin PC, Dale LC, Stead LF, 2007                                                               | Y    | X                    | X                    | X               | X             | X          | Y        | No                    | X                    | X                  | X            | X                   | X                         | X                 | X                        | Y                    | Y                 | Y               | Y      | Y                | Y       | Y                         | PY         | NA          | No              | Y                            | NA                            | Y                 | Y               | Y             | No               | Y             |
| Epton T, Harris PR, Kane R, van Koningsbruggen GM, Sheeran P, 2015                                                                | No   |                      |                      | X               | X             | X          | No       | No                    | X                    | X                  |              | X                   |                           | X                 | X                        | X                    | No                | No              | Y      | No               | Y       | No                        | PY         | No          | No              | Y                            | No                            | Y                 | No              | Y             | Y                | No            |

Meta-analysis

|                                                                                                                                        | PICO | Type of study design | Participants/setting | Intervention(s) | Comparator(s) | Outcome(s) | Protocol | Study design criteria | Searched 2 databases | Provided key words | Justified PR | Searched ref. lists | Searched study registries | Consulted experts | Searched grey literature | Search within 24 mo. | Literature search | Study selection | Coding | Excluded studies | PRISMA* | Included studies - detail | RoB - RCTs | RoB - NRSIs | Funding sources | Meta-analysis methods - RCTs | Meta-analysis methods - NRSIs | Assess RoB impact | Incorporate RoB | Heterogeneity | Publication bias | COIs reported |   |
|----------------------------------------------------------------------------------------------------------------------------------------|------|----------------------|----------------------|-----------------|---------------|------------|----------|-----------------------|----------------------|--------------------|--------------|---------------------|---------------------------|-------------------|--------------------------|----------------------|-------------------|-----------------|--------|------------------|---------|---------------------------|------------|-------------|-----------------|------------------------------|-------------------------------|-------------------|-----------------|---------------|------------------|---------------|---|
| Farmer A, Perera R, Ward A, Heneghan C, Oke J, Barnett AH, Davidson MB, Guerci B, Coates V, Schwedes U, O'Malley S, 2012               | Y    | X                    | X                    | X               | X             | X          | Y        | No                    | X                    | X                  | X            | X                   | X                         | X                 | X                        | X                    | PY                | Y               | Y      | No               | No      | Y                         | Y          | NA          | Y               | Y                            | NA                            | Y                 | No              | Y             | No               | Y             |   |
| Fletcher BR, Hartmann-Boyce J, Hinton L, McManus RJ, 2015                                                                              | Y    | X                    | X                    | X               |               | X          | Y        | No                    | X                    | X                  | X            | X                   | X                         |                   | X                        | X                    | PY                | Y               | Y      | No               | Y       | Y                         | No         | No          | Y               | No                           | No                            | No                | No              | Y             | No               | Y             |   |
| French DP, Olander EK, Chisholm A, Mc Sharry J, 2014                                                                                   | Y    | X                    | X                    | X               |               | X          | No       | No                    | X                    | X                  |              | X                   |                           |                   |                          | X                    | No                | No              | No     | No               | No      | No                        | No         | No          | No              | No                           | No                            | No                | No              | No            | No               | Y             |   |
| Glynn LG, Murphy AW, Smith SM, Schroeder K, Fahey T, 2010                                                                              | Y    | X                    | X                    | X               | X             | X          | No       | No                    | X                    | X                  | X            |                     | X                         |                   |                          |                      | PY                | Y               | Y      | No               | Y       | PY                        | Y          | NA          | No              | No                           | NA                            | No                | No              | No            | No               | Y             |   |
| Goodwin L, Ostuzzi G, Khan N, Hotopf MH, Moss-Morris R, 2016                                                                           | Y    | X                    | X                    | X               |               | X          | No       | No                    | X                    | X                  |              |                     |                           |                   |                          | X                    | No                | Y               | Y      | No               | Y       | Y                         | Y          | NA          | No              | Y                            | NA                            | No                | Y               | Y             | No               | Y             |   |
| Hajek P, Stead LF, West R, Jarvis M, Hartmann-Boyce J, Lancaster T, 2013                                                               | Y    | X                    | X                    | X               | X             | X          | PY       | No                    | X                    | X                  | X            |                     | X                         |                   |                          | X                    | PY                | No              | Y      | Y                | Y       | Y                         | Y          | NA          | No              | Y                            | NA                            | Y                 | Y               | Y             | No               | Y             |   |
| Harkin B, Webb TL, Chang BP, Prestwich A, Conner M, Kellar I, Benn Y, Sheeran P, 2016                                                  | Y    | X                    | X                    | X               | X             | X          | No       | No                    | X                    | X                  |              | X                   |                           | X                 | X                        |                      | No                | No              | Y      | No               | Y       | No                        | PY         | NA          | No              | Y                            | NA                            | Y                 | Y               | Y             | Y                | No            |   |
| Higgins TJ, Middleton KR, Winner L, Janelle CM, 2014                                                                                   | Y    | X                    | X                    | X               |               | X          | No       | No                    | X                    | X                  |              | X                   |                           |                   |                          |                      | No                | No              | No     | No               | Y       | Y                         | Y          | NA          | No              | Y                            | NA                            | No                | No              | Y             | Y                | No            |   |
| Janssen V, De Gucht V, Dusseldorp E, Maes S, 2013                                                                                      | Y    | X                    | X                    | X               |               | X          | No       | No                    | X                    | X                  |              |                     |                           |                   |                          |                      | No                | Y               | Y      | No               | Y       | Y                         | PY         | NA          | No              | Y                            | NA                            | Y                 | Y               | Y             | Y                | Y             |   |
| Jones A, Di Lemma LCG, Robinson E, Christiansen P, Nolan S, Tudur-Smith C, Field M, 2016                                               | Y    | X                    | X                    | X               | X             | X          | No       | No                    | X                    | X                  | X            | X                   |                           | X                 | X                        | X                    | PY                | Y               | Y      | No               | Y       | Y                         | No         | NA          | No              | Y                            | NA                            | No                | No              | Y             | Y                | Y             |   |
| Knittle K, Maes S, de Gucht V, 2010                                                                                                    | Y    | X                    | X                    | X               |               | X          | No       | No                    | X                    | X                  |              |                     |                           |                   |                          | X                    | No                | No              | Y      | No               | Y       | Y                         | PY         | NA          | No              | Y                            | NA                            | Y                 | No              | No            | Y                | No            |   |
| Lara J, Evans EH, O'Brien N, Moynihan PJ, Meyer TD, Adamson AJ, Errington L, Sniehotta FF, White M, Mathers JC, 2014                   | Y    | X                    | X                    | X               |               | X          | Y        | No                    | X                    | X                  | X            |                     |                           |                   | X                        | X                    | PY                | Y               | Y      | No               | Y       | No                        | Y          | NA          | No              | No                           | NA                            | No                | No              | No            | No               | Y             | Y |
| Lenferink A, Brusse-Keizer M, van der Valk PD, Frith PA, Zwerink M, Monninkhof EM, van der Palen J, Effing TW, 2017                    | Y    | X                    | X                    | X               | X             | X          | Y        | No                    | X                    | X                  | X            | X                   | X                         | X                 | X                        | X                    | Y                 | Y               | Y      | Y                | Y       | Y                         | Y          | NA          | No              | Y                            | NA                            | Y                 | Y               | Y             | Y                | Y             |   |
| Lim S, O'Reilly S, Behrens H, Skinner T, Ellis I, Dunbar JA, 2015                                                                      | Y    |                      | X                    | X               |               | X          | No       | No                    | X                    | X                  | X            |                     | X                         |                   |                          | X                    | PY                | Y               | Y      | No               | Y       | Y                         | Y          | No          | No              | Y                            | NA                            | No                | No              | Y             | Y                | Y             |   |
| Lin MY, Liu MF, Hsu LF, Tsai PS, 2017                                                                                                  | Y    | X                    | X                    | X               | X             | X          | No       | No                    | X                    | X                  |              | X                   |                           |                   |                          | X                    | No                | Y               | Y      | No               | Y       | PY                        | Y          | NA          | No              | Y                            | NA                            | No                | Y               | Y             | Y                | No            |   |
| Luangsanatip N, Hongsuwan M, Limmathurotsakul D, Lubell Y, Lee AS, Harbarth S, Day NP, Graves N, Cooper BS, 2015                       | Y    | X                    | X                    | X               | X             | X          | No       | No                    | X                    | X                  | X            | X                   | X                         |                   |                          | X                    | PY                | Y               | Y      | Y                | Y       | Y                         | Y          | Y           | No              | Y                            | Y                             | No                | No              | Y             | Y                | Y             |   |
| Malanda UL, Welschen LMC, Riphagen II, Dekker JM, Nijpels G, Bot SDM, 2012                                                             | Y    | X                    | X                    | X               | X             | X          | Y        | No                    | X                    | X                  | X            | X                   | X                         |                   | X                        | X                    | PY                | Y               | Y      | Y                | Y       | Y                         | Y          | NA          | Y               | Y                            | NA                            | Y                 | Y               | Y             | No               | Y             |   |
| McDermott MS, Oliver M, Iverson D, Sharma R, 2016                                                                                      | Y    | X                    | X                    | X               | X             | X          | No       | No                    | X                    | X                  |              |                     |                           |                   | X                        | X                    | No                | No              | No     | No               | Y       | PY                        | No         | No          | No              | No                           | No                            | No                | No              | No            | No               | No            | Y |
| McEwan D, Harden SM, Zumbo BD, Sylvester BD, Kaulius M, Ruissen GR, Dowd AJ, Beauchamp MR, 2016                                        | Y    | X                    | X                    | X               | X             | X          | No       | No                    | X                    | X                  | X            | X                   | X                         |                   | X                        | X                    | PY                | No              | Y      | No               | Y       | PY                        | Y          | NA          | No              | Y                            | NA                            | Y                 | Y               | Y             | Y                | Y             |   |
| Michie S, Abraham C, Whittington C, McAteer J, Gupta S, 2009                                                                           | Y    | X                    | X                    | X               | X             | X          | No       | No                    | X                    | X                  |              | X                   | X                         |                   |                          | X                    | No                | Y               | Y      | Y                | Y       | PY                        | No         | No          | No              | Y                            | Y                             | No                | No              | Y             | Y                | No            |   |
| O'Brien N, McDonald S, Araujo-Soares V, Lara J, Errington L, Godfrey A, Meyer TD, Rochester L, Mathers JC, White M, Sniehotta FF, 2015 | Y    | X                    | X                    | X               | X             | X          | Y        | No                    | X                    | X                  |              | X                   |                           |                   |                          |                      | No                | Y               | Y      | No               | Y       | Y                         | Y          | NA          | No              | Y                            | NA                            | Y                 | Y               | Y             | Y                | Y             |   |
| Olander EK, Fletcher H, Williams S, Lou A, Turner A, French DP, 2013                                                                   | Y    | X                    | X                    | X               | X             | X          | No       | No                    | X                    | X                  | X            | X                   |                           |                   |                          | X                    | PY                | No              | No     | No               | No      | No                        | No         | No          | No              | No                           | No                            | No                | No              | No            | Y                | Y             | Y |
| Onrust SA, Otten R, Lammers J, Smit F, 2016                                                                                            | Y    | X                    | X                    | X               | X             | X          | No       | No                    | X                    | X                  |              | X                   | X                         |                   |                          | X                    | No                | No              | Y      | No               | Y       | No                        | No         | No          | No              | Y                            | No                            | No                | No              | Y             | No               | Y             |   |
| Ruppar TM, Dunbar-Jacob JM, Mehr DR, Lewis L, Conn VS, 2017                                                                            | Y    | X                    | X                    | X               |               | X          | No       | Y                     | X                    | X                  | X            | X                   | X                         | X                 | X                        | X                    | Y                 | No              | Y      | No               | Y       | No                        | PY         | NA          | Y               | Y                            | NA                            | Y                 | No              | No            | Y                | Y             |   |
| Samdal GB, Eide GE, Barth T, Williams G, Meland E, 2017                                                                                | Y    | X                    | X                    | X               |               | X          | Y        | No                    | X                    | X                  | X            |                     |                           |                   |                          |                      | PY                | Y               | Y      | No               | Y       | Y                         | Y          | NA          | No              | Y                            | NA                            | Y                 | Y               | Y             | Y                | Y             |   |
| Scott-Sheldon LA, Carey KB, Elliott JC, Garey L, Carey MP, 2014                                                                        | Y    | X                    | X                    | X               | X             | X          | No       | No                    | X                    | X                  | X            | X                   |                           | X                 | X                        | X                    | PY                | No              | Y      | Y                | Y       | PY                        | PY         | NA          | No              | Y                            | NA                            | No                | No              | Y             | Y                | Y             |   |

Meta-analysis

|                                                                                                    | PICO | Type of study design | Participants/setting | Intervention(s) | Comparator(s) | Outcome(s) | Protocol | Study design criteria | Searched 2 databases | Provided key words | Justified PR | Searched ref. lists | Searched study registries | Consulted experts | Searched grey literature | Search within 24 mo. | Literature search | Study selection | Coding | Excluded studies | PRISMA* | Included studies - detail | RoB - RCTs | RoB - NRSIs | Funding sources | Meta-analysis methods - RCTs | Meta-analysis methods - NRSIs | Assess RoB impact | Incorporate RoB | Heterogeneity | Publication bias | COIs reported |
|----------------------------------------------------------------------------------------------------|------|----------------------|----------------------|-----------------|---------------|------------|----------|-----------------------|----------------------|--------------------|--------------|---------------------|---------------------------|-------------------|--------------------------|----------------------|-------------------|-----------------|--------|------------------|---------|---------------------------|------------|-------------|-----------------|------------------------------|-------------------------------|-------------------|-----------------|---------------|------------------|---------------|
| Sheeran P, Maki A, Montanaro E, Avishai-Yitshak A, Bryan A, Klein WM. P, Miles E, Rothman AJ, 2016 | Y    | X                    | X                    | X               | X             | X          | No       | Y                     | X                    | X                  | X            | X                   |                           | X                 | X                        | X                    | PY                | No              | Y      | No               | Y       | No                        | PY         | NA          | No              | Y                            | NA                            | Y                 | Y               | Y             | No               | No            |
| Sherifali D, Bai JW, Kenny M, Warren R, Ali MU, 2015                                               | Y    | X                    | X                    | X               |               | X          | No       | No                    | X                    |                    |              |                     | X                         |                   |                          |                      | No                | Y               | Y      | No               | No      | Y                         | PY         | NA          | No              | Y                            | NA                            | Y                 | Y               | No            | No               | Y             |
| Song F, Huttunen-Lenz M, Holland R, 2010                                                           | Y    | X                    | X                    | X               |               | X          | No       | No                    | X                    | X                  |              | X                   | X                         |                   |                          | X                    | No                | No              | No     | No               | No      | Y                         | No         | NA          | No              | No                           | NA                            | No                | Y               | Y             | No               | No            |
| Spohr SA, Nandy R, Gandhiraj D, Vemulapalli A, Anne S, Walters ST, 2015                            | No   | X                    |                      | X               |               | X          | No       | No                    | X                    | X                  |              | X                   |                           |                   | X                        | X                    | No                | Y               | No     | No               | Y       | PY                        | No         | NA          | No              | Y                            | NA                            | No                | No              | Y             | Y                | Y             |
| St Amand A, Bard DE, Silovsky JF, 2008                                                             | No   |                      | X                    | X               |               | X          | No       | No                    | X                    |                    |              | X                   |                           | X                 |                          |                      | No                | No              | No     | No               | No      | PY                        | No         | No          | No              | Y                            | No                            | No                | No              | No            | No               | No            |
| Sykes-Muskett BJ, Prestwich A, Lawton RJ, Armitage CJ, 2015                                        | Y    | X                    | X                    | X               |               | X          | Y        | No                    | X                    | X                  |              | X                   | X                         |                   |                          | X                    | No                | Y               | Y      | No               | Y       | Y                         | Y          | NA          | No              | Y                            | NA                            | Y                 | No              | Y             | No               | Y             |
| Tanner-Smith EE, Lipsey MW, 2015                                                                   | Y    | X                    | X                    | X               | X             | X          | No       | No                    | X                    |                    | X            | X                   | X                         |                   | X                        | X                    | No                | Y               | Y      | No               | Y       | PY                        | No         | No          | No              | Y                            | Y                             | No                | No              | Y             | Y                | Y             |
| Tanner-Smith EE, Steinka-Fry KT, Hennessy EA, Lipsey MW, Winters KC, 2015                          | Y    | X                    | X                    | X               | X             | X          | No       | No                    | X                    |                    | X            | X                   | X                         |                   | X                        | X                    | No                | Y               | Y      | No               | Y       | No                        | No         | No          | Y               | Y                            | No                            | No                | Y               | Y             | Y                | Y             |
| Toli A, Webb TL, Hardy GE, 2016                                                                    | Y    | X                    | X                    | X               | X             | X          | No       | No                    | X                    | X                  |              | X                   |                           | X                 | X                        | X                    | No                | No              | Y      | No               | Y       | PY                        | No         | No          | No              | Y                            | No                            | No                | No              | Y             | Y                | No            |
| Turton R, Bruidegom K, Cardi V, Hirsch CR, Treasure J, 2016                                        | No   | X                    |                      | X               | X             | X          | No       | Y                     | X                    | X                  |              | X                   |                           |                   |                          | X                    | No                | Y               | No     | No               | Y       | Y                         | No         | NA          | No              | Y                            | NA                            | No                | No              | Y             | Y                | Y             |
| Tyson M, Covey J, Rosenthal HE, 2014                                                               | Y    | X                    | X                    | X               | X             | X          | No       | No                    | X                    | X                  | X            | X                   |                           | X                 |                          | X                    | PY                | No              | No     | No               | No      | Y                         | Y          | PY          | No              | No                           | Y                             | Y                 | No              | Y             | No               | Y             |
| van Genugten L, Dusseldorp E, Webb TL, van Empelen P, 2016                                         | No   | X                    |                      | X               |               | X          | No       | No                    | X                    | X                  | X            |                     |                           | X                 | X                        | X                    | PY                | No              | No     | No               | Y       | PY                        | No         | NA          | No              | Y                            | NA                            | No                | No              | Y             | No               | Y             |
| Zhu H, Zhu Y, Leung SW, 2016                                                                       | Y    | X                    | X                    | X               | X             | X          | Y        | No                    | X                    | X                  | X            | X                   | X                         |                   | X                        | X                    | PY                | Y               | Y      | No               | Y       | No                        | Y          | NA          | No              | Y                            | NA                            | Y                 | No              | Y             | Y                | Y             |

Note. NA=Not applicable. NRSI=Non-randomized studies of interventions. PICO=Defined Problem/Patient/Population, Intervention/Indicator, Comparison, Outcome. PRISMA: Moher et al.'s reporting standards. PY=Partial yes. RCT=Randomized controlled trial. RoB=Risk of bias. Y=Yes. X=Item was reported by review authors and was used to determine AMSTAR 2 tool item rating.

Table 3.

*Correlations of methodological quality scores (proportion of relevant AMSTAR 2 items satisfied) with other methodological variables of interest (l = 66)*

| Dimension                          | 1      | 2     | 3      | 4    | 5     |
|------------------------------------|--------|-------|--------|------|-------|
| 1. Methodological quality          | —      |       |        |      |       |
| 2. Publication date                | .31*   | —     |        |      |       |
| 3. Number of authors               | .49*** | .09   | —      |      |       |
| 4. Review size ( <i>k</i> )        | -.14   | .05   | -.15   | —    |       |
| 5. Journal impact                  | .21    | -.04  | .49*** | -.04 | —     |
| 6. Citations per year <sup>a</sup> | .10    | -.26* | .24    | .06  | .49** |

*Note.* *l* = number of meta-analyses.

\* $p < .05$ . \*\* $p < .01$ . \*\*\* $p < .001$ .

<sup>a</sup>Adjusted for publication year.

Table 4

Correlations of individual AMSTAR 2 items satisfied with other methodological variables of interest ( $l = 66$ )

| Variable                       | Year of publication | Number of authors | Review size ( $k$ ) | Journal Impact Factor | Citations per year <sup>a</sup> |
|--------------------------------|---------------------|-------------------|---------------------|-----------------------|---------------------------------|
| PICO                           | 0.12                | 0.22              | -0.22               | -0.01                 | -0.05                           |
| Protocol                       | 0.04                | 0.28*             | -0.16               | 0.17                  | 0.06                            |
| Study design criteria          | -0.04               | -0.02             | 0.06                | -0.10                 | -0.07                           |
| Literature search              | 0.13                | 0.22              | -0.13               | 0.07                  | 0.03                            |
| Study selection                | 0.20                | 0.35**            | -0.19               | 0.09                  | 0.05                            |
| Coding                         | 0.02                | 0.31*             | 0.17                | 0.22                  | 0.13                            |
| Excluded studies               | -0.07               | 0.18              | -0.06               | 0.21                  | 0.36**                          |
| PRISMA flow chart              | 0.48***             | 0.16              | -0.02               | 0.17                  | 0.09                            |
| Included studies - detail      | -0.06               | 0.09              | -0.26*              | 0.10                  | -0.04                           |
| Risk of bias - RCTs            | 0.32**              | 0.33**            | -0.23               | 0.10                  | -0.13                           |
| Risk of bias - NRSIs           | 0.14                | 0.29**            | -0.28*              | 0.02                  | -0.13                           |
| Funding sources                | 0.01                | 0.35*             | -0.04               | 0.10                  | -0.05                           |
| Meta-analysis methods - RCTs   | 0.16                | 0.16              | 0.08                | 0.19                  | 0.12                            |
| Meta-analysis methods - NRSIs  | 0.16                | 0.30*             | -0.29*              | 0.04                  | -0.15                           |
| Assess risk of bias impact     | 0.11                | 0.27*             | -0.14               | 0.04                  | -0.04                           |
| Incorporate risk of bias       | 0.09                | 0.22              | -0.01               | -0.06                 | -0.03                           |
| Evaluate heterogeneity         | 0.17                | 0.23              | 0.14                | 0.15                  | 0.17                            |
| Publication bias               | 0.16                | 0.09              | 0.12                | -0.01                 | 0.11                            |
| Conflicts of interest reported | 0.32*               | 0.22              | -0.02               | 0.20                  | -0.01                           |

Note.  $l$  = number of meta-analyses.

\* $p < .05$ . \*\* $p < .01$ . \*\*\* $p < .001$ .

<sup>a</sup>Adjusted for publication year.

Table 5.

*Intervention Components Examined Across Reviews, for each Individual Review*

| Study                                                                                                 | Taxonomy Used | Goal setting | Prompt review of goals | Prompt self-monitoring | Emotional control training | Prompt self-talk | Stress management | Action planning | Barrier identification/ Problem solving | Relapse prevention/ Coping planning | Time management | Provide feedback on performance | Inhibitory control training <sup>a</sup> | Self-management <sup>a</sup> | Implementation Intentions <sup>a</sup> | Self-affirmation <sup>a</sup> | Self-control <sup>a</sup> | High vs. low SR <sup>a</sup> | Total components examined |
|-------------------------------------------------------------------------------------------------------|---------------|--------------|------------------------|------------------------|----------------------------|------------------|-------------------|-----------------|-----------------------------------------|-------------------------------------|-----------------|---------------------------------|------------------------------------------|------------------------------|----------------------------------------|-------------------------------|---------------------------|------------------------------|---------------------------|
| Abraham, Graham-Rowe, 2009                                                                            | 1             | ◆            | ◆                      | ◆                      |                            |                  |                   |                 |                                         |                                     |                 |                                 |                                          |                              |                                        |                               |                           |                              | 3                         |
| Adriaanse, Vinkers, De Ridder, Hox, De Wit, 2011                                                      | NA/NR         |              |                        |                        |                            |                  |                   |                 |                                         |                                     |                 |                                 |                                          |                              | ◆                                      |                               |                           |                              | 1                         |
| Albarracín, Albarracín, Durantini, 2008                                                               | NA/NR         |              |                        |                        |                            |                  |                   |                 | ◆                                       |                                     |                 |                                 |                                          |                              |                                        |                               |                           |                              | 1                         |
| Allom, Mullan, Hagger, 2016                                                                           | NA/NR         |              |                        |                        | ◆                          |                  |                   |                 |                                         |                                     |                 |                                 |                                          |                              |                                        |                               |                           |                              | 1                         |
| Bartlett, Sheeran, Hawley, 2014                                                                       | 5             | ◆            | ◆                      | ◆                      |                            | ◆                |                   | ◆               | ◆                                       | ◆                                   |                 | ◆                               |                                          |                              |                                        |                               |                           |                              | 8                         |
| Bélanger-Gravel, Godin, Amireault, 2013                                                               | NA/NR         |              |                        |                        |                            |                  |                   | ◆               | ◆                                       |                                     |                 |                                 |                                          |                              | ◆                                      |                               |                           |                              | 3                         |
| Bolen, Chandar, Falck-Ytter, Tyler, Perzynski, Gertz, Sage, Lewis, Cobabe, Ye, Menegay, Windish, 2014 | NA/NR         |              |                        |                        |                            |                  |                   |                 | ◆                                       |                                     |                 |                                 |                                          |                              |                                        |                               |                           |                              | 1                         |
| Brannon, Cushing, 2015                                                                                | 1             |              |                        | ◆                      |                            |                  |                   |                 |                                         |                                     |                 |                                 |                                          |                              |                                        |                               |                           |                              | 1                         |
| Bravata, Smith-Spangler, Sundaram, Gienger, Lin, Lewis, Stave, Olkin, Sirard, 2007                    | NA/NR         | ◆            |                        | ◆                      |                            |                  |                   |                 |                                         |                                     |                 |                                 |                                          |                              |                                        |                               |                           |                              | 2                         |
| Bray, Holder, Mant, McManus, 2010                                                                     | NA/NR         |              |                        | ◆                      |                            |                  |                   |                 |                                         |                                     |                 |                                 |                                          |                              |                                        |                               |                           |                              | 1                         |
| Casey, Coote, Shirazipour, Hannigan, Motl, Martin Ginis, Latimer-Cheung, 2017                         | 2             | ◆            |                        |                        |                            |                  |                   |                 |                                         |                                     |                 |                                 |                                          |                              |                                        |                               |                           |                              | 1                         |
| Chamberlain, O'Mara-Eves, Porter, Coleman, Perlen, Thomas, McKenzie, 2017                             | NA/NR         |              |                        |                        |                            |                  |                   |                 |                                         |                                     |                 | ◆                               |                                          |                              |                                        |                               |                           |                              | 1                         |
| Chase, Bogener, Ruppap, Conn, 2016                                                                    | NA/NR         | ◆            |                        | ◆                      |                            |                  |                   |                 | ◆                                       |                                     |                 |                                 |                                          |                              |                                        |                               |                           |                              | 3                         |
| Cheng, Sit, Choi, Chair, Li, He, 2017                                                                 | 5             | ◆            |                        |                        |                            |                  |                   | ◆               | ◆                                       |                                     |                 | ◆                               |                                          |                              |                                        |                               |                           |                              | 4                         |



| Study                                                                                                 | Taxonomy Used | Goal setting | Prompt review of goals | Prompt self-monitoring | Emotional control training | Prompt self-talk | Stress management | Action planning | Barrier identification/Problem solving | Relapse prevention/Coping planning | Time management | Provide feedback on performance | Inhibitory control training <sup>a</sup> | Self-management <sup>a</sup> | Implementation Intentions <sup>a</sup> | Self-affirmation <sup>a</sup> | Self-control <sup>a</sup> | High vs. low SR <sup>a</sup> | Total components examined |
|-------------------------------------------------------------------------------------------------------|---------------|--------------|------------------------|------------------------|----------------------------|------------------|-------------------|-----------------|----------------------------------------|------------------------------------|-----------------|---------------------------------|------------------------------------------|------------------------------|----------------------------------------|-------------------------------|---------------------------|------------------------------|---------------------------|
| Conn, Hafdahl, Brown, Brown, 2008                                                                     | NA/NR         | ◆            |                        | ◆                      |                            |                  |                   |                 | ◆                                      |                                    |                 | ◆                               |                                          |                              |                                        |                               |                           |                              | 4                         |
| Conn, Hafdahl, Cooper, Ruppap, Mehr, Russell, 2009                                                    | NA/NR         |              |                        | ◆                      |                            |                  |                   |                 |                                        |                                    |                 |                                 |                                          |                              |                                        |                               |                           |                              | 1                         |
| Conn, Hafdahl, Mehr, 2011                                                                             | NA/NR         | ◆            |                        | ◆                      |                            |                  |                   |                 | ◆                                      | ◆                                  |                 |                                 |                                          |                              |                                        |                               |                           |                              | 4                         |
| Conn, Ruppap, 2017                                                                                    | NA/NR         | ◆            |                        | ◆                      |                            |                  | ◆                 |                 | ◆                                      |                                    |                 | ◆                               |                                          |                              |                                        |                               |                           |                              | 5                         |
| Conn, Ruppap, Chase, Enriquez, Cooper, 2015                                                           | NA/NR         |              |                        | ◆                      |                            |                  |                   |                 | ◆                                      |                                    |                 | ◆                               |                                          |                              |                                        |                               |                           |                              | 3                         |
| Cristea, Kok, Cuijpers, 2016                                                                          |               |              |                        |                        |                            |                  |                   |                 |                                        |                                    |                 |                                 |                                          |                              |                                        |                               |                           |                              | 0                         |
| Cugelman, Thelwall, Dawes, 2011                                                                       | 4             | ◆            |                        | ◆                      | ◆                          | ◆                | ◆                 | ◆               | ◆                                      | ◆                                  | ◆               | ◆                               |                                          |                              |                                        |                               |                           |                              | 10                        |
| Darling, Sato, 2017                                                                                   | NA/NR         |              |                        | ◆                      |                            |                  |                   |                 |                                        |                                    |                 |                                 |                                          |                              |                                        |                               |                           |                              | 1                         |
| Demonceau, Ruppap, Kristanto, Hughes, Fargher, Kardas, Geest, Dobbels, Lewek, Urquhart, Vrijens, 2013 | NA/NR         |              |                        |                        |                            |                  |                   |                 |                                        |                                    |                 | ◆                               |                                          |                              |                                        |                               |                           |                              | 1                         |
| Denford, Taylor, Campbell, Greaves, 2014                                                              | 1             | ◆            | ◆                      | ◆                      |                            |                  | ◆                 |                 | ◆                                      |                                    |                 | ◆                               |                                          |                              |                                        |                               |                           |                              | 6                         |
| Dombrowski, Sniehotta, Avenel, Johnston, MacLennan, Araújo-Soares, 2012                               | 1             |              |                        | ◆                      |                            |                  |                   |                 |                                        | ◆                                  |                 |                                 |                                          |                              |                                        |                               |                           |                              | 2                         |
| Ebbert, Montori, Vickers, Erwin, Dale, Stead, 2015                                                    | NA/NR         |              |                        |                        |                            |                  |                   |                 |                                        |                                    |                 | ◆                               |                                          |                              |                                        |                               |                           |                              | 1                         |
| Epton, Harris, Kane, van Koningsbruggen, Sheeran, 2015                                                | NA/NR         |              |                        |                        |                            |                  |                   |                 |                                        |                                    |                 |                                 |                                          |                              |                                        | ◆                             |                           |                              | 1                         |
| Farmer, Perera, Ward, Heneghan, Oke, Barnett, Davidson, Guerci, Coates, Schwedes, O'Malley, 2012      | NA/NR         |              |                        | ◆                      |                            |                  |                   |                 |                                        |                                    |                 |                                 |                                          |                              |                                        |                               |                           |                              | 1                         |
| Fletcher, Hartmann-Boyce, Hinton, McManus, 2015                                                       | NA/NR         |              |                        | ◆                      |                            |                  |                   |                 |                                        |                                    |                 |                                 |                                          |                              |                                        |                               |                           |                              | 1                         |

| Study                                                                                           | Taxonomy Used | Goal setting | Prompt review of goals | Prompt self-monitoring | Emotional control training | Prompt self-talk | Stress management | Action planning | Barrier identification/Problem solving | Relapse prevention/Coping planning | Time management | Provide feedback on performance | Inhibitory control training <sup>a</sup> | Self-management <sup>a</sup> | Implementation Intentions <sup>a</sup> | Self-affirmation <sup>a</sup> | Self-control <sup>a</sup> | High vs. low SR <sup>a</sup> | Total components examined |
|-------------------------------------------------------------------------------------------------|---------------|--------------|------------------------|------------------------|----------------------------|------------------|-------------------|-----------------|----------------------------------------|------------------------------------|-----------------|---------------------------------|------------------------------------------|------------------------------|----------------------------------------|-------------------------------|---------------------------|------------------------------|---------------------------|
| French, Olander, Chisholm, Mc Sharry, 2014                                                      | 2             | ◆            | ◆                      | ◆                      |                            |                  | ◆                 | ◆               | ◆                                      | ◆                                  |                 | ◆                               |                                          |                              |                                        |                               |                           |                              | 8                         |
| Glynn, Murphy, Smith, Schroeder, Fahey, 2010                                                    | NA/NR         |              |                        | ◆                      |                            |                  |                   |                 |                                        |                                    |                 |                                 |                                          |                              |                                        |                               |                           |                              | 1                         |
| Goodwin, Ostuzzi, Khan, Hotopf, Moss-Morris, 2016                                               | 2             | ◆            | ◆                      |                        |                            |                  | ◆                 |                 |                                        |                                    |                 | ◆                               |                                          |                              |                                        |                               |                           |                              | 4                         |
| Hajek, Stead, West, Jarvis, Hartmann-Boyce, Lancaster, 2013                                     | NA/NR         |              |                        |                        |                            |                  |                   |                 |                                        | ◆                                  |                 |                                 |                                          |                              |                                        |                               |                           |                              | 1                         |
| Harkin, Webb, Chang, Prestwich, Conner, Kellar, Benn, Sheeran, 2016                             | 3             | ◆            | ◆                      | ◆                      |                            |                  |                   | ◆               |                                        |                                    |                 |                                 |                                          |                              |                                        |                               |                           |                              | 4                         |
| Higgins, Middleton, Winner, Janelle, 2014                                                       | NA/NR         | ◆            |                        | ◆                      |                            |                  |                   |                 |                                        |                                    |                 |                                 |                                          |                              |                                        |                               |                           |                              | 2                         |
| Janssen, De Gucht, Dusseldorp, Maes, 2013                                                       | 5             |              |                        |                        |                            |                  |                   |                 |                                        |                                    |                 |                                 |                                          |                              |                                        |                               |                           | ◆                            | 1                         |
| Jones, Di Lemma, Robinson, Christiansen, Nolan, Tudur-Smith, Field, 2016                        | NA/NR         |              |                        |                        |                            |                  |                   |                 |                                        |                                    |                 |                                 | ◆                                        |                              |                                        |                               |                           |                              | 1                         |
| Knittle, Maes, de Gucht, 2010                                                                   | NA/NR         |              |                        |                        |                            |                  |                   |                 |                                        |                                    |                 |                                 |                                          |                              |                                        |                               |                           | ◆                            | 1                         |
| Lara, Evans, O'Brien, Moynihan, Meyer, Adamson, Errington, Sniehotta, White, Mathers, 2014      | 2             | ◆            | ◆                      |                        |                            |                  |                   |                 | ◆                                      |                                    |                 | ◆                               |                                          |                              |                                        |                               |                           |                              | 4                         |
| Lenferink, Brusse-Keizer, van der Valk, Frith, Zwerink, Monninkhof, van der Palen, Effing, 2017 | 3             |              |                        |                        |                            |                  |                   | ◆               |                                        |                                    |                 |                                 |                                          |                              |                                        |                               |                           |                              | 1                         |
| Lim, O'Reilly, Behrens, Skinner, Ellis, Dunbar, 2015                                            | NA/NR         |              |                        | ◆                      |                            |                  |                   |                 |                                        |                                    |                 |                                 |                                          |                              |                                        |                               |                           |                              | 1                         |

| Study                                                                                                         | Taxonomy Used | Goal setting | Prompt review of goals | Prompt self-monitoring | Emotional control training | Prompt self-talk | Stress management | Action planning | Barrier identification/ Problem solving | Relapse prevention/ Coping planning | Time management | Provide feedback on performance | Inhibitory control training <sup>a</sup> | Self-management <sup>a</sup> | Implementation Intentions <sup>a</sup> | Self-affirmation <sup>a</sup> | Self-control <sup>a</sup> | High vs. low SR <sup>a</sup> | Total components examined |
|---------------------------------------------------------------------------------------------------------------|---------------|--------------|------------------------|------------------------|----------------------------|------------------|-------------------|-----------------|-----------------------------------------|-------------------------------------|-----------------|---------------------------------|------------------------------------------|------------------------------|----------------------------------------|-------------------------------|---------------------------|------------------------------|---------------------------|
| Lin, Liu, Hsu, Tsai, 2017                                                                                     | NA/NR         |              |                        |                        |                            |                  |                   |                 |                                         |                                     |                 |                                 |                                          | ◆                            |                                        |                               |                           |                              | 1                         |
| Luangasanatip, Hongsuwan, Limmathurotsakul, Lubell, Lee, Harbarth, Day, Graves, Cooper, 2015                  | NA/NR         | ◆            |                        |                        |                            |                  |                   |                 |                                         |                                     |                 |                                 |                                          |                              |                                        |                               |                           |                              | 1                         |
| Malanda, Welschen, Riphagen, Dekker, Nijpels, Bot, 2012                                                       | NA/NR         |              |                        | ◆                      |                            |                  |                   |                 |                                         |                                     |                 |                                 |                                          |                              |                                        |                               |                           |                              | 1                         |
| McDermott, Oliver, Iverson, Sharma, 2016                                                                      | 1             | ◆            | ◆                      | ◆                      |                            |                  |                   | ◆               | ◆                                       | ◆                                   |                 | ◆                               |                                          |                              |                                        |                               |                           |                              | 7                         |
| McEwan, Harden, Zumbo, Sylvester, Kaulius, Ruissen, Dowd, Beauchamp, 2016                                     | 1             | ◆            |                        |                        |                            |                  |                   | ◆               |                                         |                                     |                 | ◆                               |                                          |                              |                                        |                               |                           |                              | 3                         |
| Michie, Abraham, Whittington, McAteer, Gupta, 2009                                                            | 1             | ◆            | ◆                      | ◆                      |                            | ◆                | ◆                 |                 | ◆                                       | ◆                                   | ◆               | ◆                               |                                          |                              |                                        |                               |                           |                              | 9                         |
| O'Brien, McDonald, Araujo-Soares, Lara, Errington, Godfrey, Meyer, Rochester, Mathers, White, Sniehotta, 2015 | 2             | ◆            | ◆                      | ◆                      |                            |                  |                   |                 | ◆                                       |                                     |                 | ◆                               |                                          |                              |                                        |                               |                           |                              | 5                         |
| Olander, Fletcher, Williams, Lou, Turner, French, 2013                                                        | 2             | ◆            | ◆                      | ◆                      |                            | ◆                | ◆                 | ◆               | ◆                                       | ◆                                   | ◆               | ◆                               |                                          |                              |                                        |                               |                           |                              | 10                        |
| Onrust, Otten, Lammers, Smit, 2016                                                                            | NA/NR         |              |                        |                        | ◆                          |                  | ◆                 |                 | ◆                                       |                                     |                 |                                 |                                          |                              |                                        |                               | ◆                         |                              | 4                         |
| Ruppar, Dunbar-Jacob, Mehr, Lewis, Conn, 2017                                                                 | NA/NR         |              |                        | ◆                      |                            |                  |                   |                 |                                         |                                     |                 |                                 |                                          |                              |                                        |                               |                           |                              | 1                         |
| Samdal, Eide, Barth, Williams, Meland, 2017                                                                   | 3             | ◆            | ◆                      | ◆                      |                            |                  |                   |                 | ◆                                       |                                     |                 | ◆                               |                                          |                              |                                        |                               |                           |                              | 5                         |
| Scott-Sheldon, Carey, Elliott, Garey, Carey, 2014                                                             | NA/NR         | ◆            |                        |                        |                            |                  |                   |                 |                                         |                                     |                 |                                 |                                          |                              |                                        |                               |                           |                              | 1                         |

| Study                                                                         | Taxonomy Used | Goal setting | Prompt review of goals | Prompt self-monitoring | Emotional control training | Prompt self-talk | Stress management | Action planning | Barrier identification/ Problem solving | Relapse prevention/ Coping planning | Time management | Provide feedback on performance | Inhibitory control training <sup>a</sup> | Self-management <sup>a</sup> | Implementation Intentions <sup>a</sup> | Self-affirmation <sup>a</sup> | Self-control <sup>a</sup> | High vs. low SR <sup>a</sup> | Total components examined |
|-------------------------------------------------------------------------------|---------------|--------------|------------------------|------------------------|----------------------------|------------------|-------------------|-----------------|-----------------------------------------|-------------------------------------|-----------------|---------------------------------|------------------------------------------|------------------------------|----------------------------------------|-------------------------------|---------------------------|------------------------------|---------------------------|
| Sheeran, Maki, Montanaro, Avishai-Yitshak, Bryan, Klein, Miles, Rothman, 2016 |               |              |                        |                        |                            |                  |                   |                 |                                         |                                     |                 |                                 |                                          |                              |                                        |                               |                           |                              | 0                         |
| Sherifali, Bai, Kenny, Warren, Ali, 2015                                      | NA/NR         |              |                        |                        |                            |                  |                   |                 |                                         |                                     |                 | ◆                               |                                          | ◆                            |                                        |                               |                           |                              | 2                         |
| Song, Huttunen-Lenz, Holland, 2010                                            | NA/NR         |              |                        |                        |                            |                  |                   |                 |                                         | ◆                                   |                 |                                 |                                          |                              |                                        |                               |                           |                              | 1                         |
| Spoehr, Nandy, Gandhiraj, Vemulapalli, Anne, Walters, 2015                    | NA/NR         |              |                        |                        |                            |                  |                   |                 |                                         | ◆                                   |                 | ◆                               |                                          |                              |                                        |                               |                           |                              | 2                         |
| St Amand, Bard, Silovsky, 2008                                                | NA/NR         |              |                        |                        |                            |                  |                   |                 |                                         |                                     |                 |                                 |                                          |                              |                                        |                               | ◆                         |                              | 1                         |
| Sykes-Muskett, Prestwich, Lawton, Armitage, 2015                              | 2             | ◆            | ◆                      | ◆                      |                            |                  |                   |                 | ◆                                       |                                     |                 | ◆                               |                                          |                              |                                        |                               |                           |                              | 5                         |
| Tanner-Smith, Lipsey, 2015                                                    | NA/NR         | ◆            |                        |                        |                            |                  |                   |                 |                                         |                                     |                 | ◆                               |                                          |                              |                                        |                               |                           |                              | 2                         |
| Tanner-Smith, Steinka-Fry, Hennessy, Lipsey, Winters, 2015                    | NA/NR         | ◆            |                        |                        |                            |                  |                   |                 | ◆                                       |                                     |                 | ◆                               |                                          |                              |                                        |                               |                           |                              | 3                         |
| Toli, Webb, Hardy, 2016                                                       | NA/NR         |              |                        |                        |                            |                  |                   | ◆               |                                         |                                     |                 |                                 |                                          |                              |                                        |                               |                           |                              | 1                         |
| Turton, Bruidegom, Cardi, Hirsch, Treasure, 2016                              | NA/NR         |              |                        |                        |                            |                  |                   |                 |                                         |                                     |                 |                                 | ◆                                        |                              | ◆                                      |                               |                           |                              | 2                         |
| Tyson, Covey, Rosenthal, 2014                                                 | 1             |              | ◆                      | ◆                      |                            |                  |                   |                 | ◆                                       | ◆                                   |                 |                                 |                                          |                              |                                        |                               |                           |                              | 4                         |
| van Genugten, Dusseldorp, Webb, van Empelen, 2016                             | 2             | ◆            | ◆                      | ◆                      | ◆                          |                  | ◆                 | ◆               | ◆                                       | ◆                                   |                 | ◆                               |                                          |                              |                                        |                               |                           |                              | 9                         |
| Zhu, Zhu, Leung, 2016                                                         | NA/NR         |              |                        | ◆                      |                            |                  |                   |                 |                                         |                                     |                 |                                 |                                          |                              |                                        |                               |                           |                              | 1                         |
| <i>l</i> examining BCT                                                        |               | 28           | 15                     | 33                     | 4                          | 4                | 9                 | 12              | 24                                      | 13                                  | 3               | 25                              | 2                                        | 2                            | 3                                      | 1                             | 2                         | 1                            |                           |
| Percentage of reviews examining BCT                                           |               | 44%          | 23%                    | 52%                    | 6%                         | 6%               | 14%               | 19%             | 38%                                     | 20%                                 | 5%              | 39%                             | 3%                                       | 3%                           | 5%                                     | 2%                            | 3%                        | 2%                           |                           |

Note. SR = self-regulation. *l* = Number of reviews. NA/NR = Not applicable/Not reported. 1 = 26 BCT version (Abraham & Michie, 2008). 2 = 40 BCT version (Michie et al., 2011). 3 = 93 BCT version (Michie et al., 2013). 4 = Communication-Based Influence Components Model (Cugelman et al., 2009). 5 = Other BCT version.

<sup>a</sup>This BCT is independent of the 93-BCT taxonomy, or its earlier iterations (Michie et al., 2013).

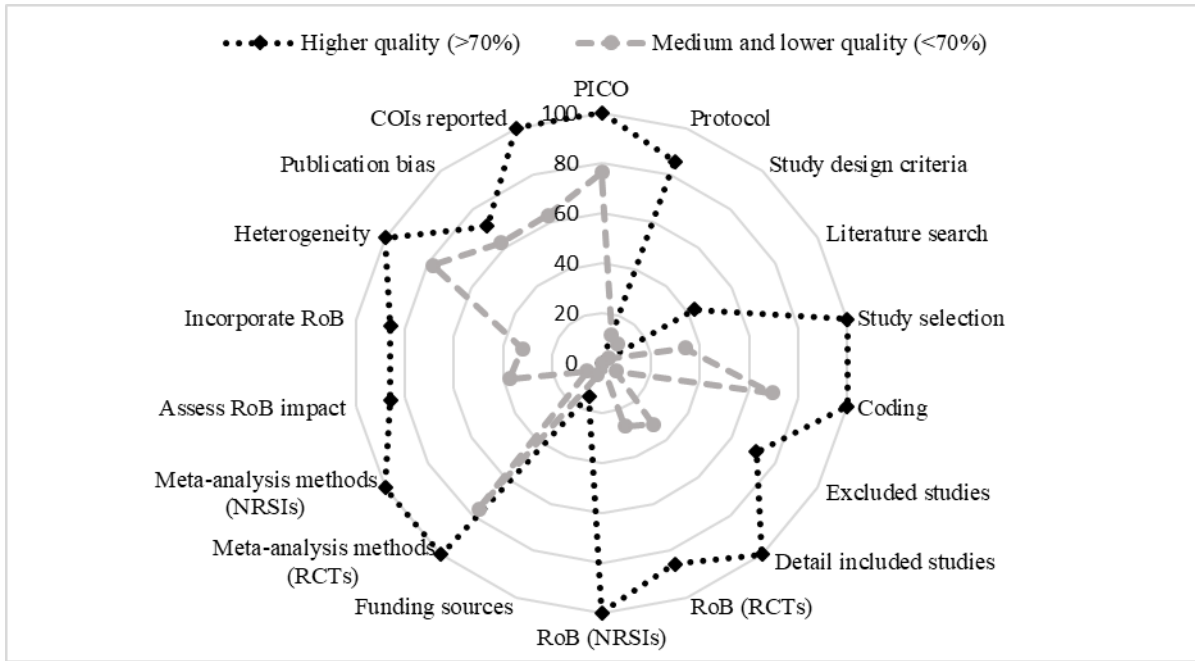

(a)

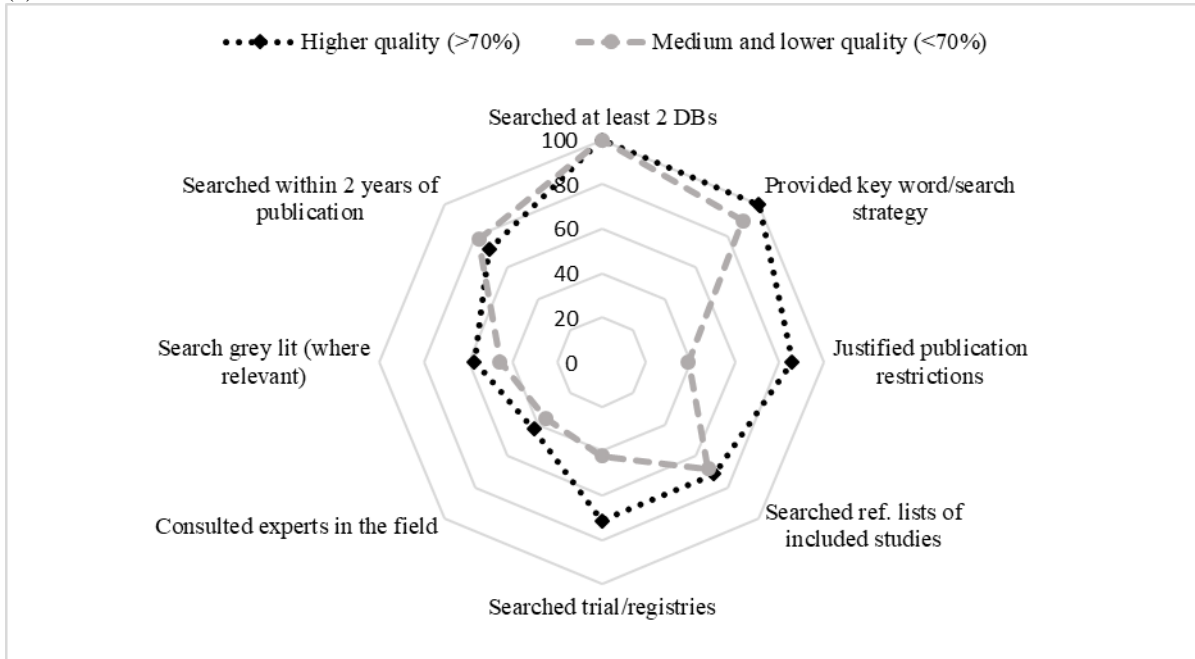

(b)

Figure 1. AMSTAR 2 item completion split by higher quality (>70%) and medium to lower quality (<70%): (a) overall and (b) by individual literature search items. COI = conflict of interest; DB = database; lit = literature; NRSI = non-randomized studies of interventions; PICO = problem/patient/population, intervention, comparison, outcome; ref.=Reference; RCT = randomized controlled trial; RoB = risk of bias.

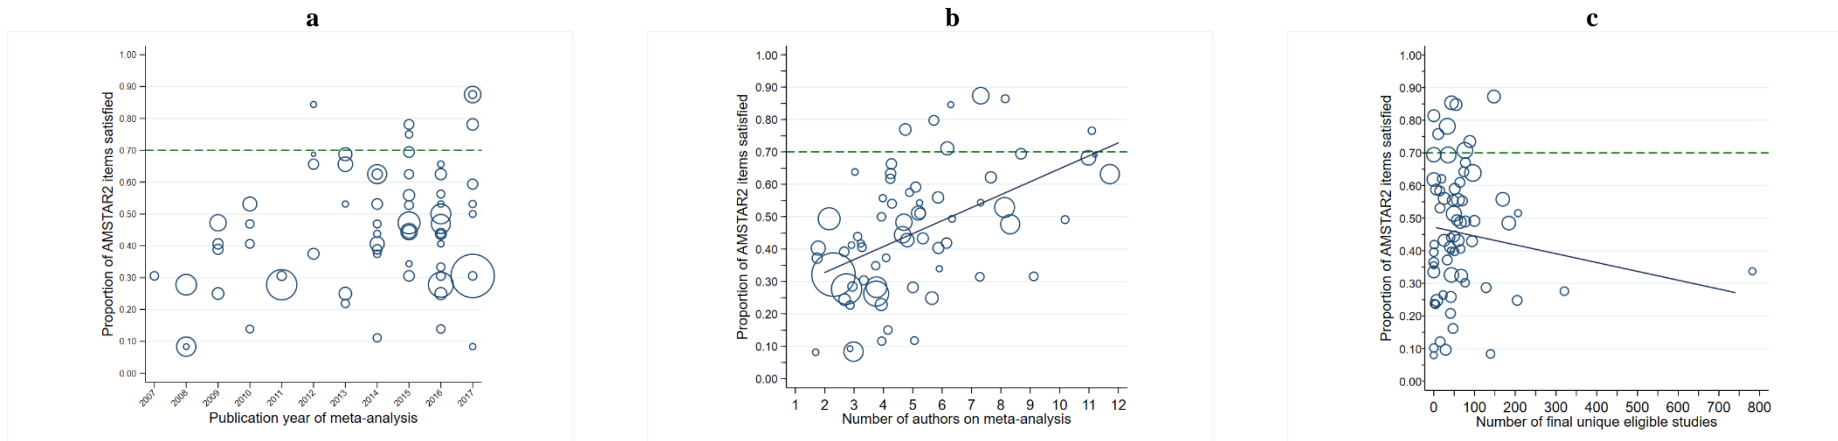

*Figure 2.* Total meta-analytic study quality (vis-à-vis the AMSTAR 2) as a function (a) of the year the review was published, (b) of the number of authors named for the meta-analysis and (c) of the number of studies meta-analysed. *Note.* In panels a and b, points are sized proportional to the number of studies pooled; in panel c, points are sized proportion to the number of authors. In panels b and c, points are jittered to reduce overlap. The solid diagonal blue line shows the best fitting linear trend, and, the dashed green line shows the cut-point for higher vs. lower quality meta-analyses.
